# Supplementary material for: Mitochondrial dysfunction is a key determinant of the rare disease lymphangioleiomyomatosis and provides a novel therapeutic target
Source: PubMed Central journal article supplement (PMC6484686; doi:10.1038/s41388-018-0625-1), 2018-12-20

# qRT-PCR analysis of angiogenesis genes

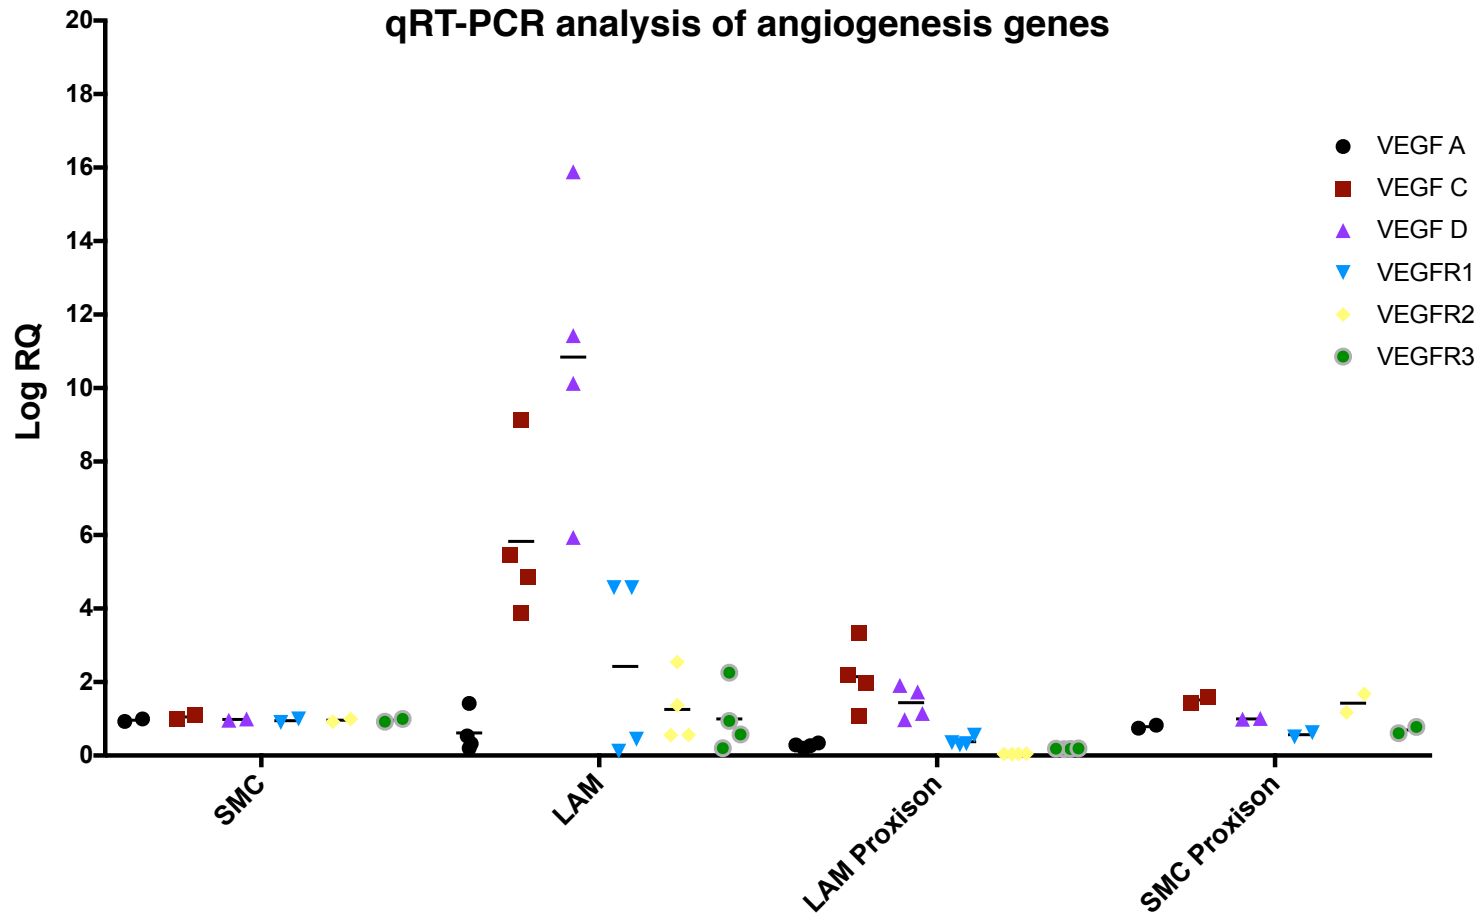

# qRT-PCR analysis of HIF1-alpha gene

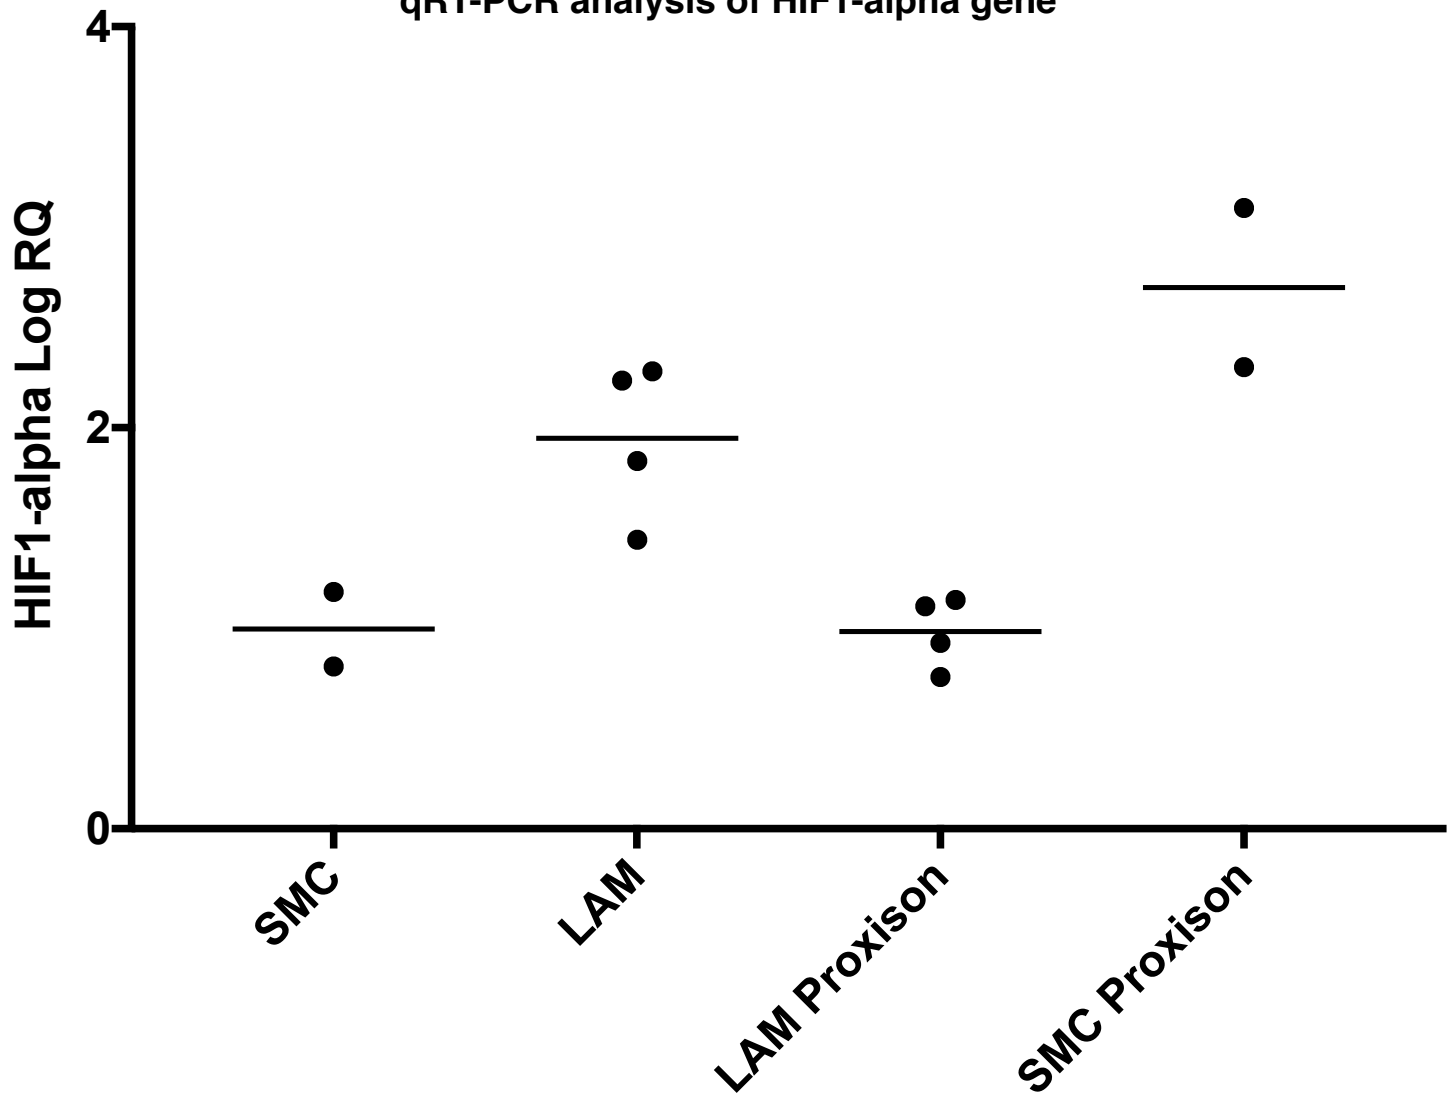

Heat map of angiogenesis protein array

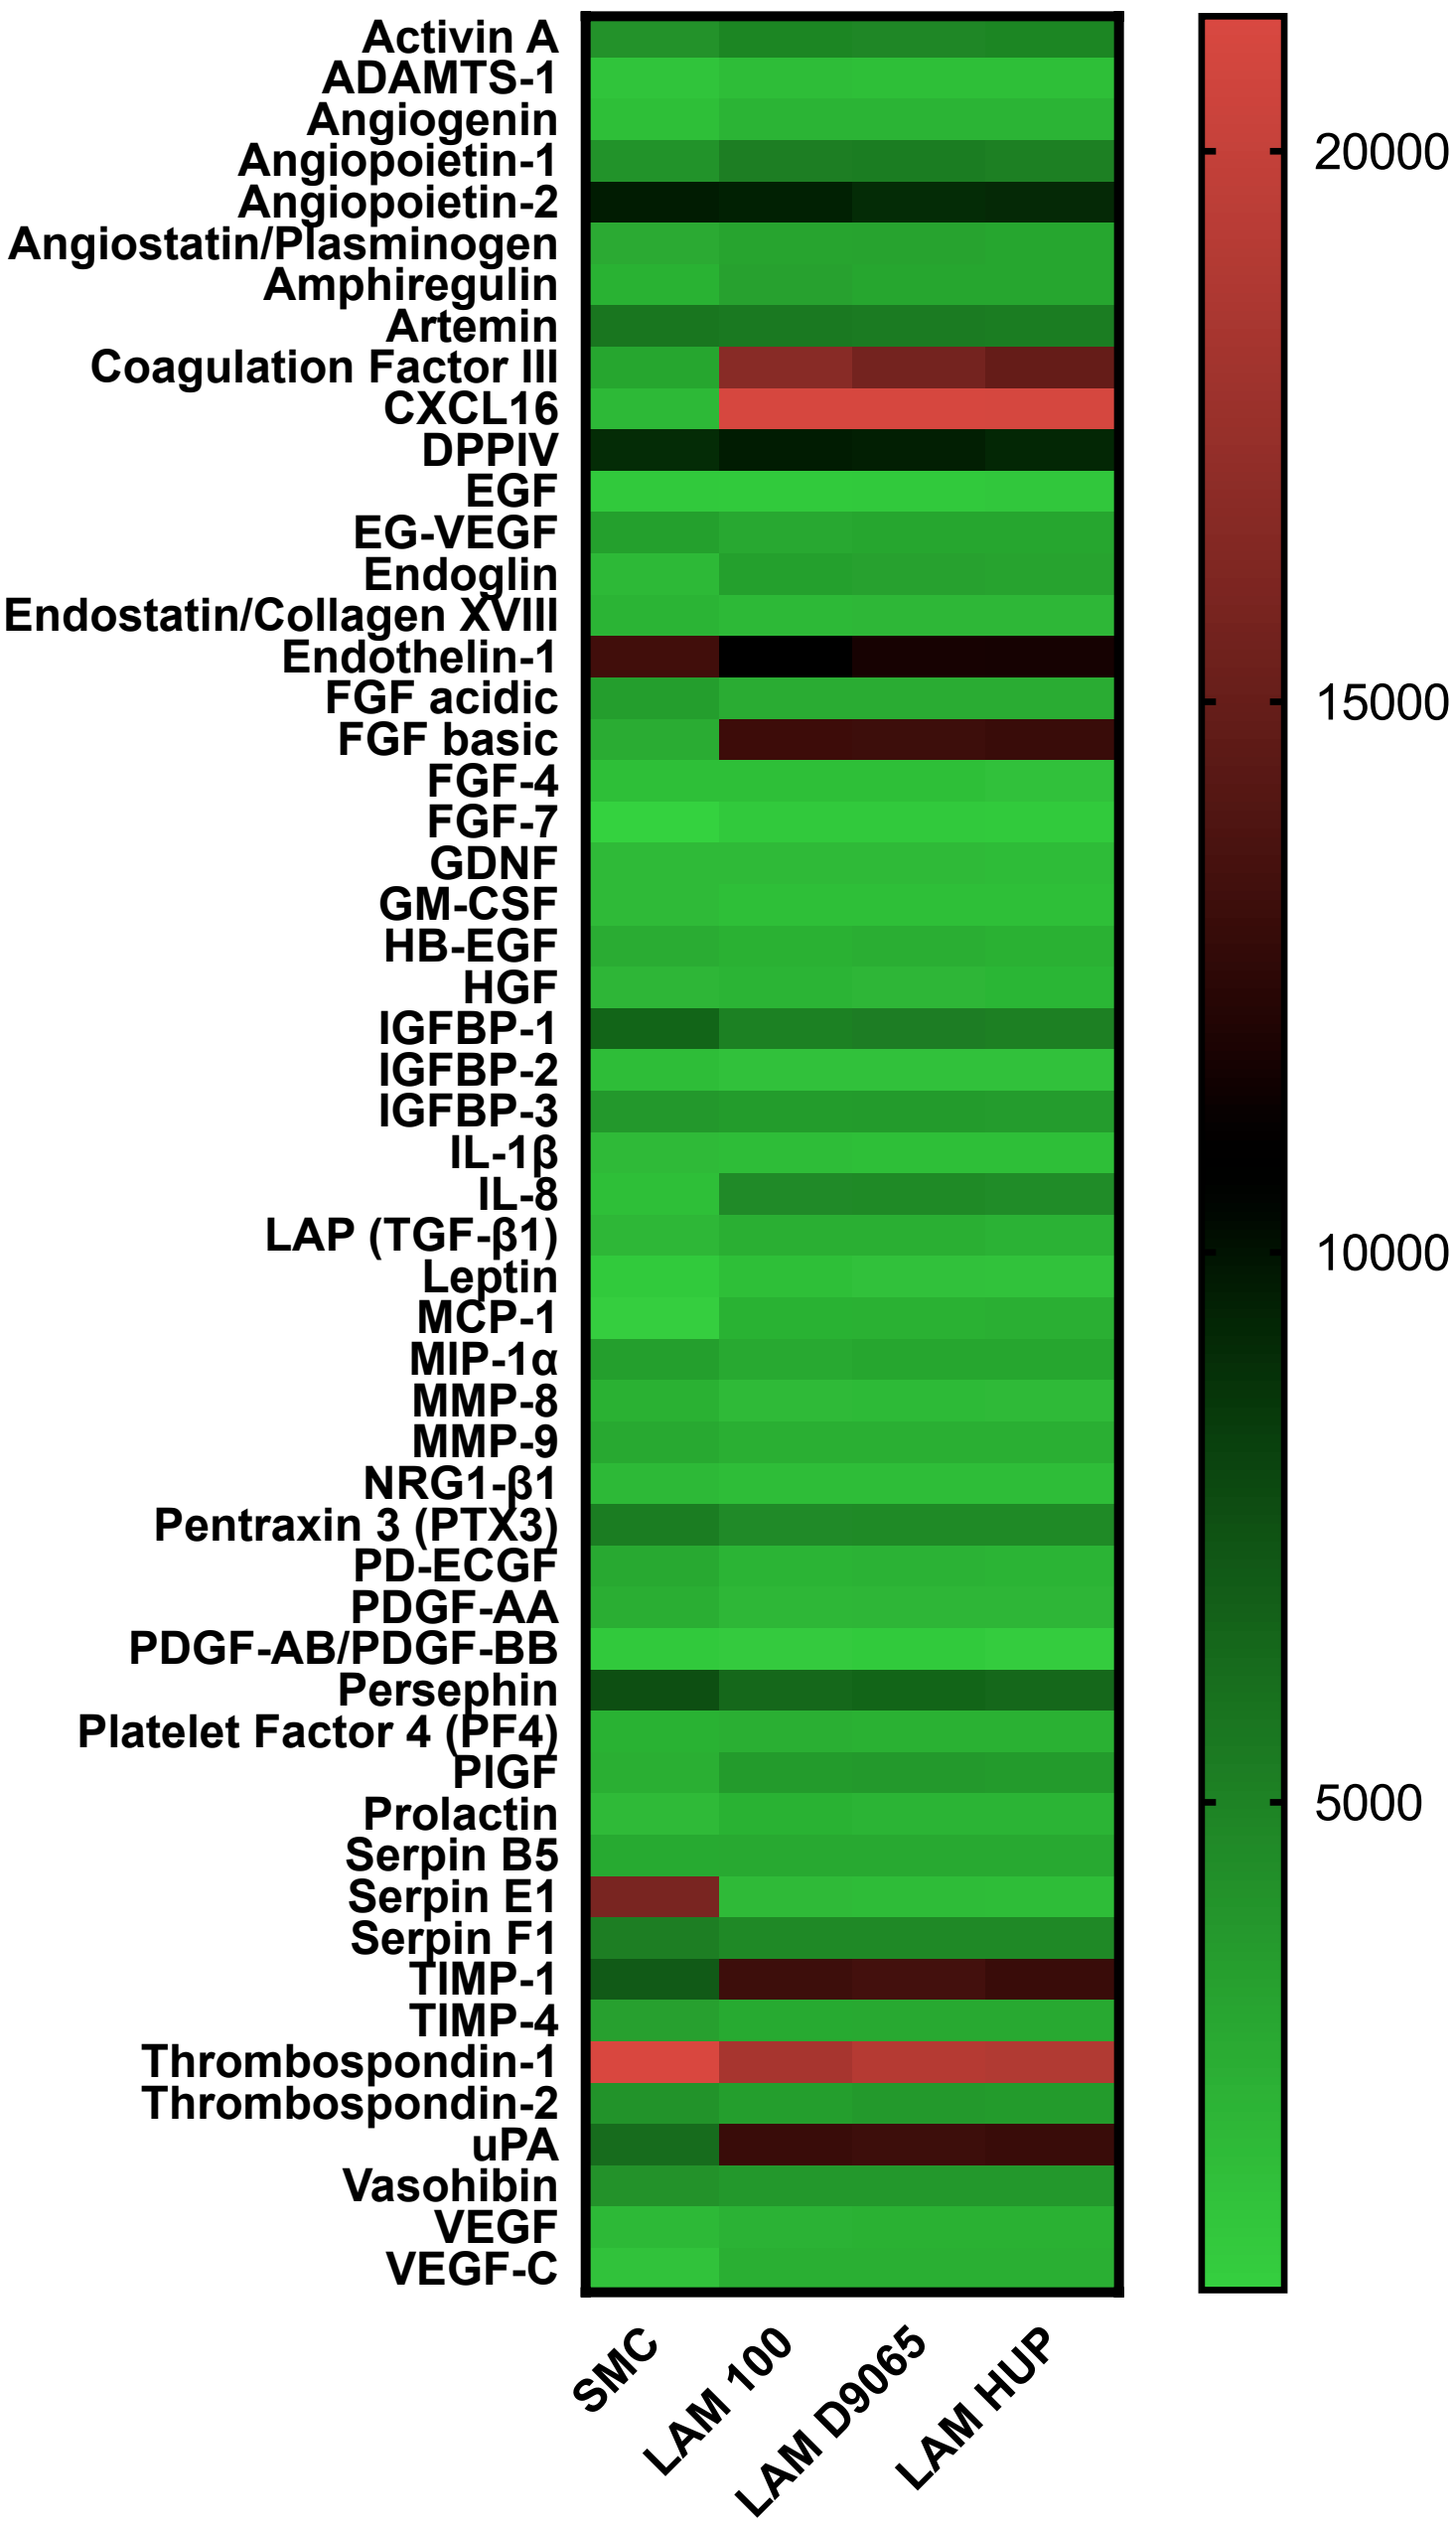

# Angiogenesis protein array pixel intensity

- SMC
- LAM

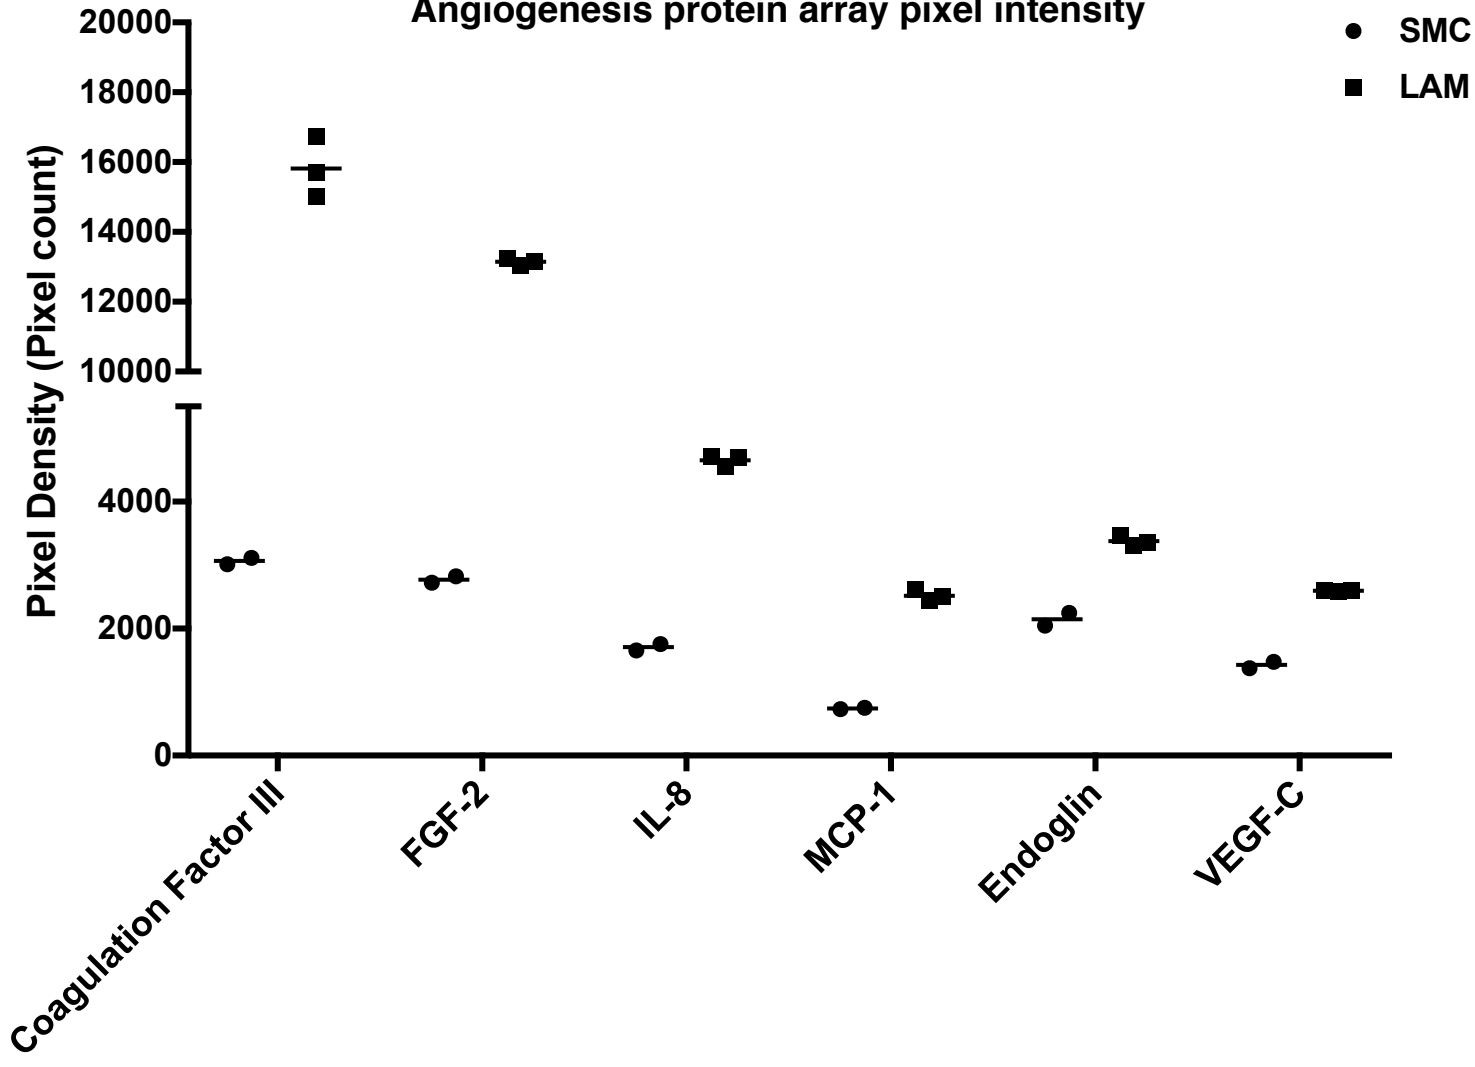

# qRT-PCR analysis of mitochondrial genes

- NRF1
- TFAM
- ▲ Cyto C
- ▼ COX4

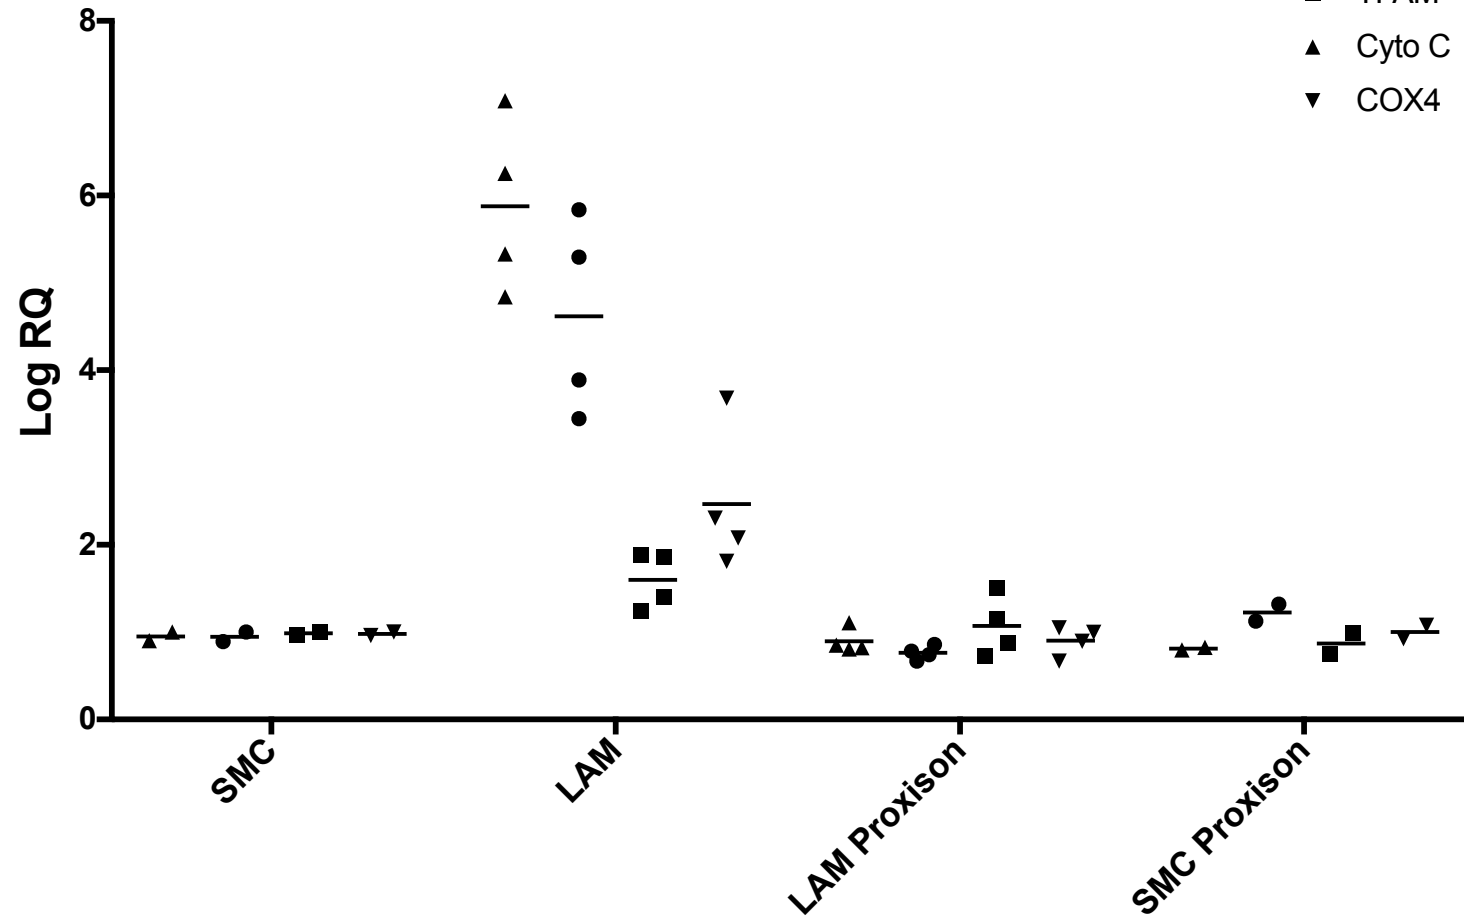

Oxygen consumption rate using Seahorse XF96

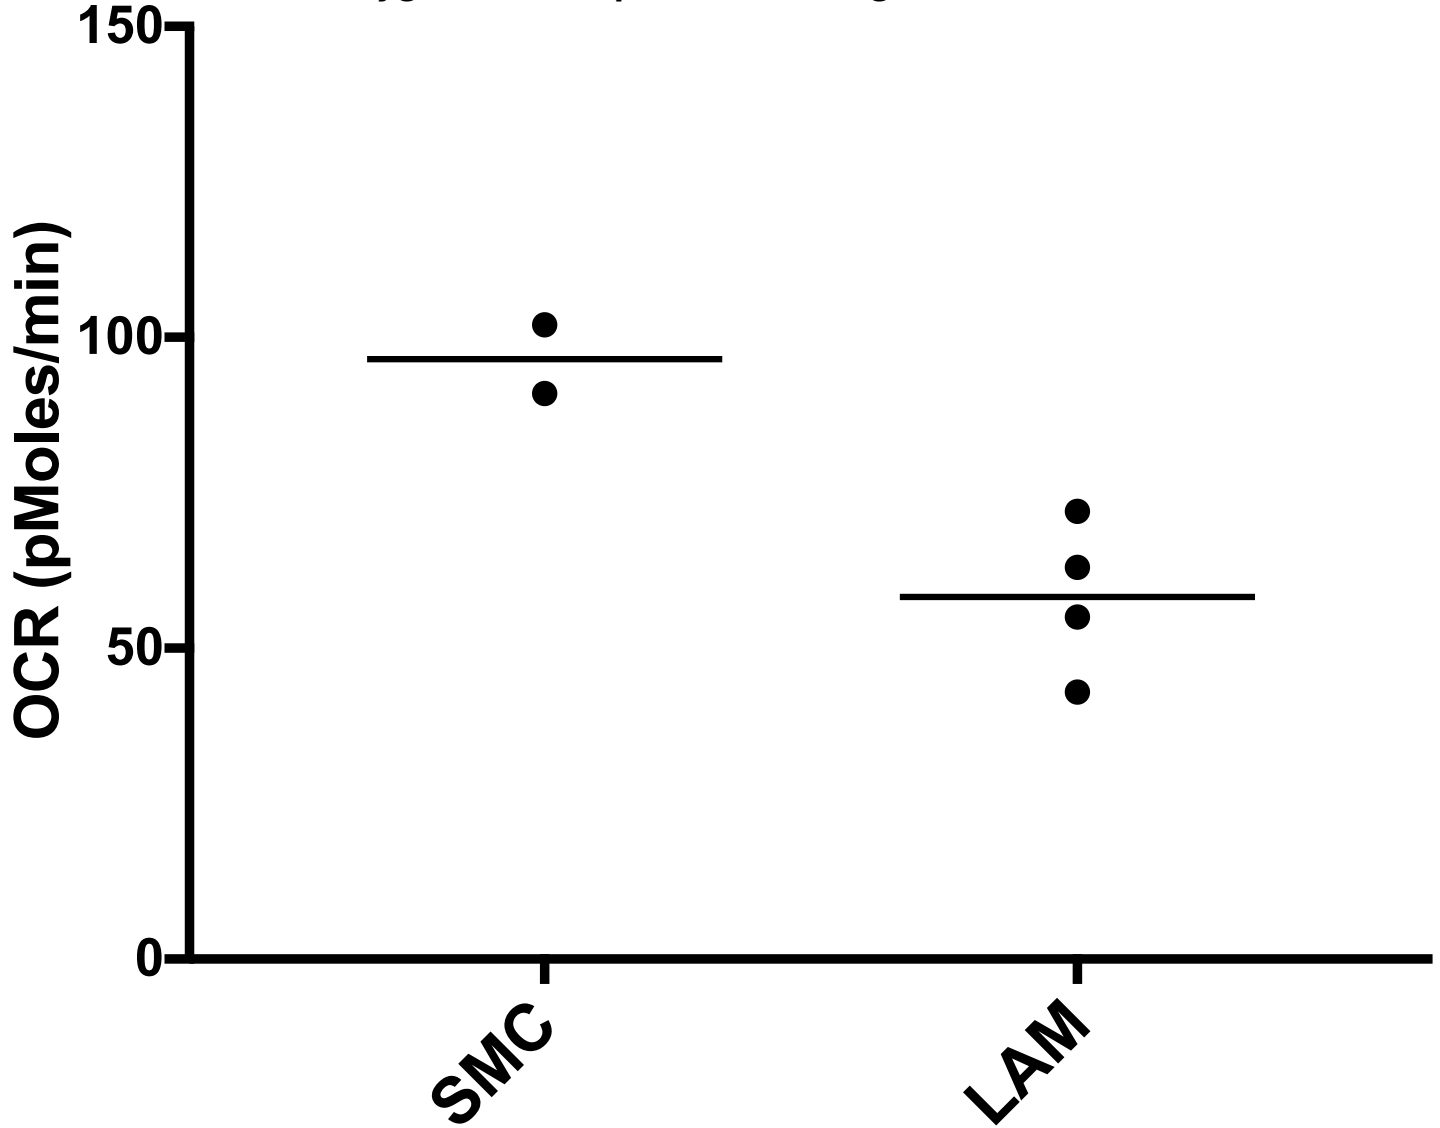

# Glycolysis rate using Seahorse XF96

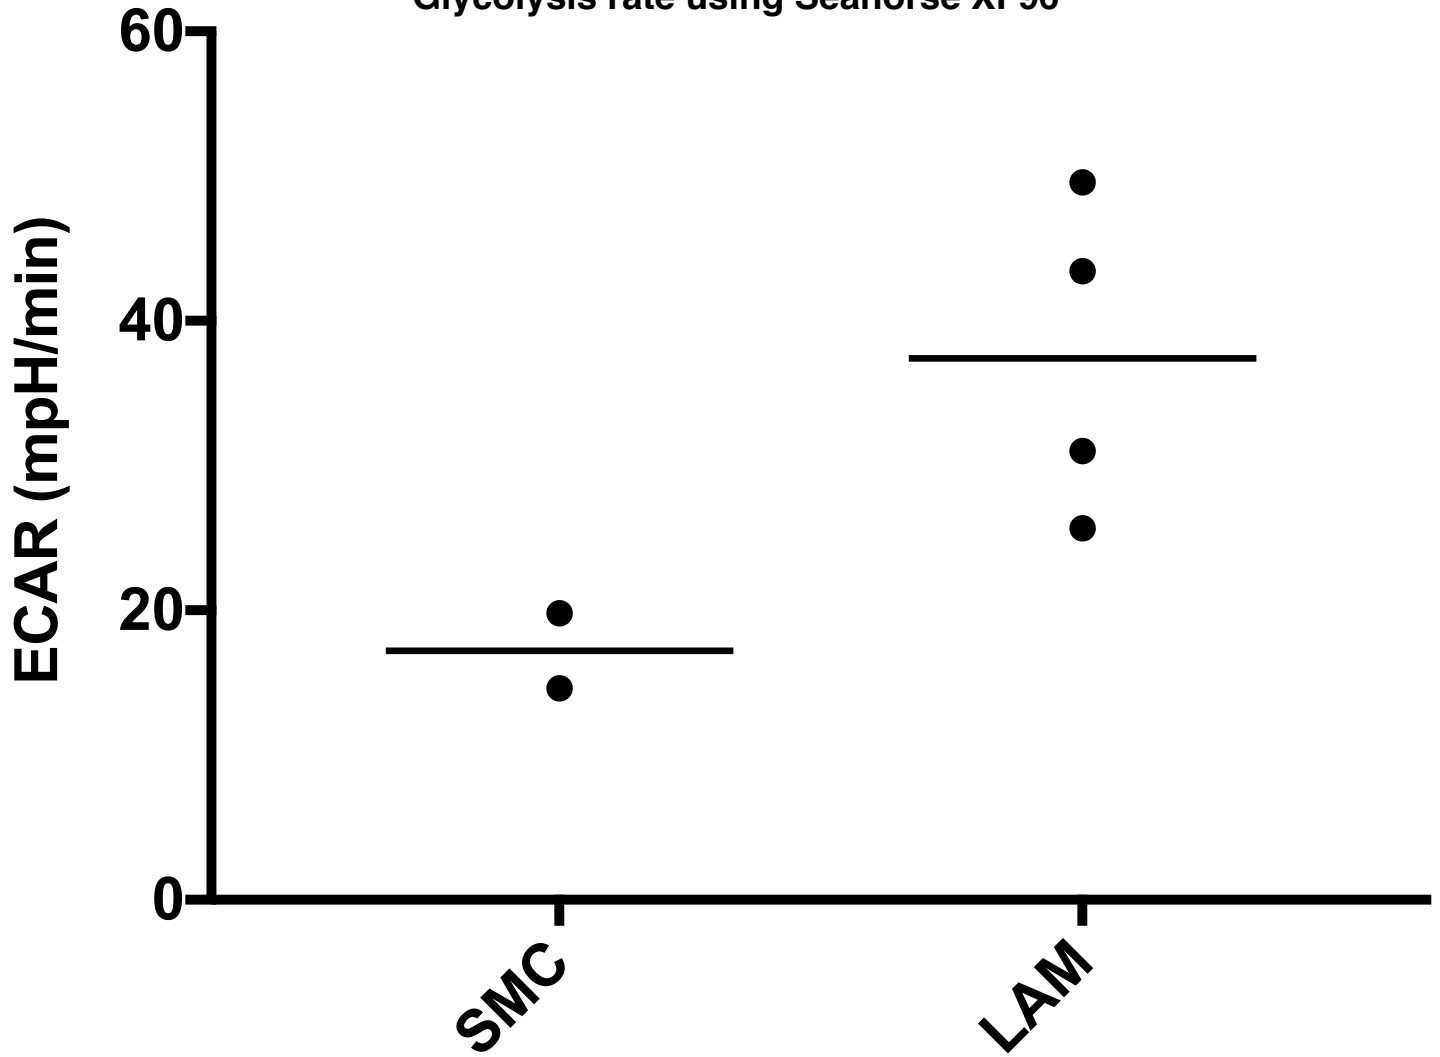

OCR/ECAR using Seahorse XF96

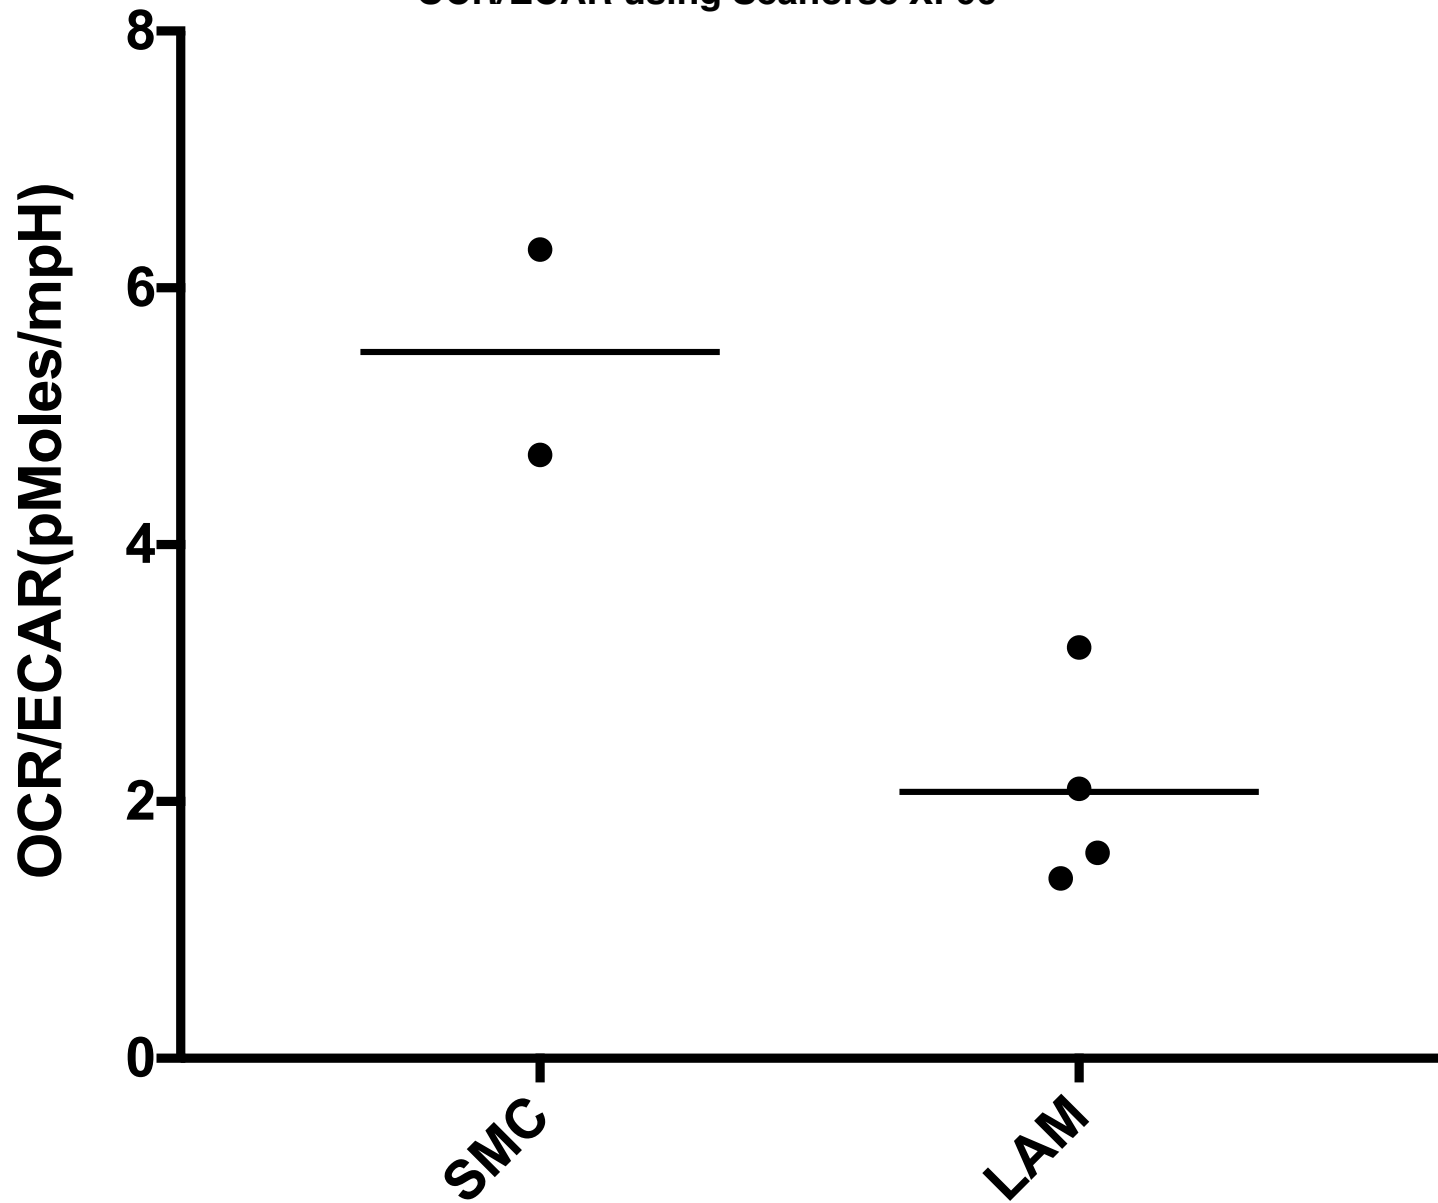



Oxygen consumption rate using Oroboros

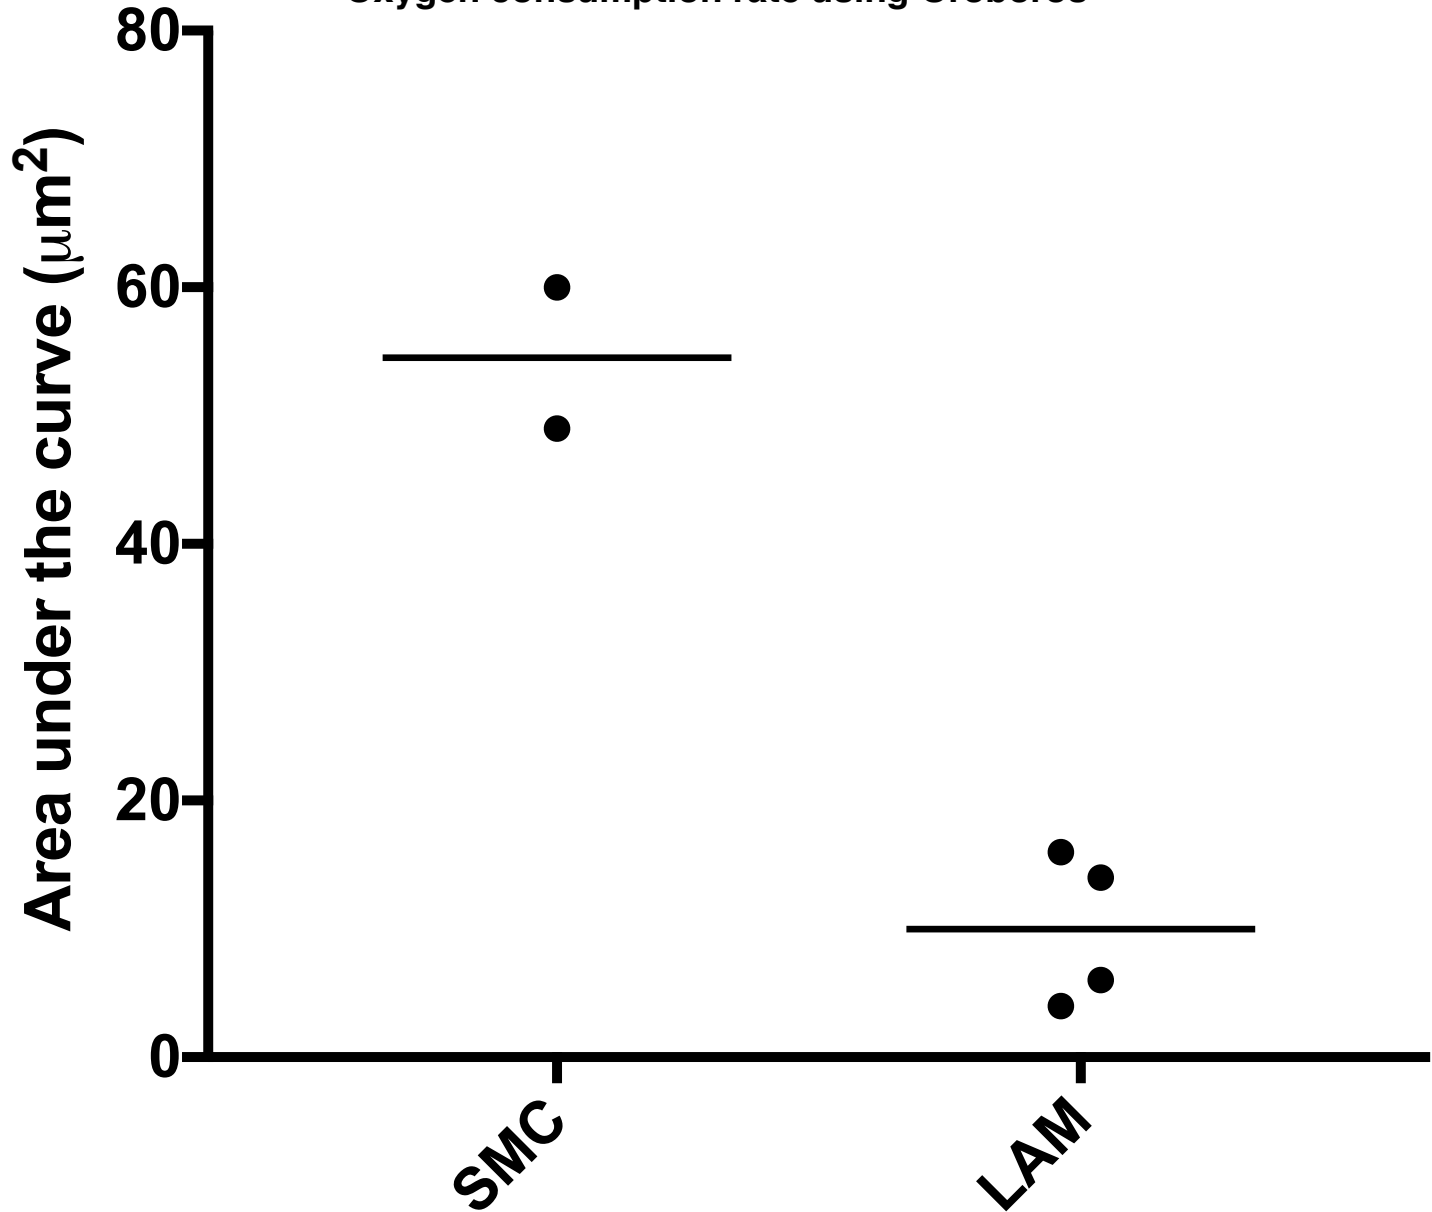

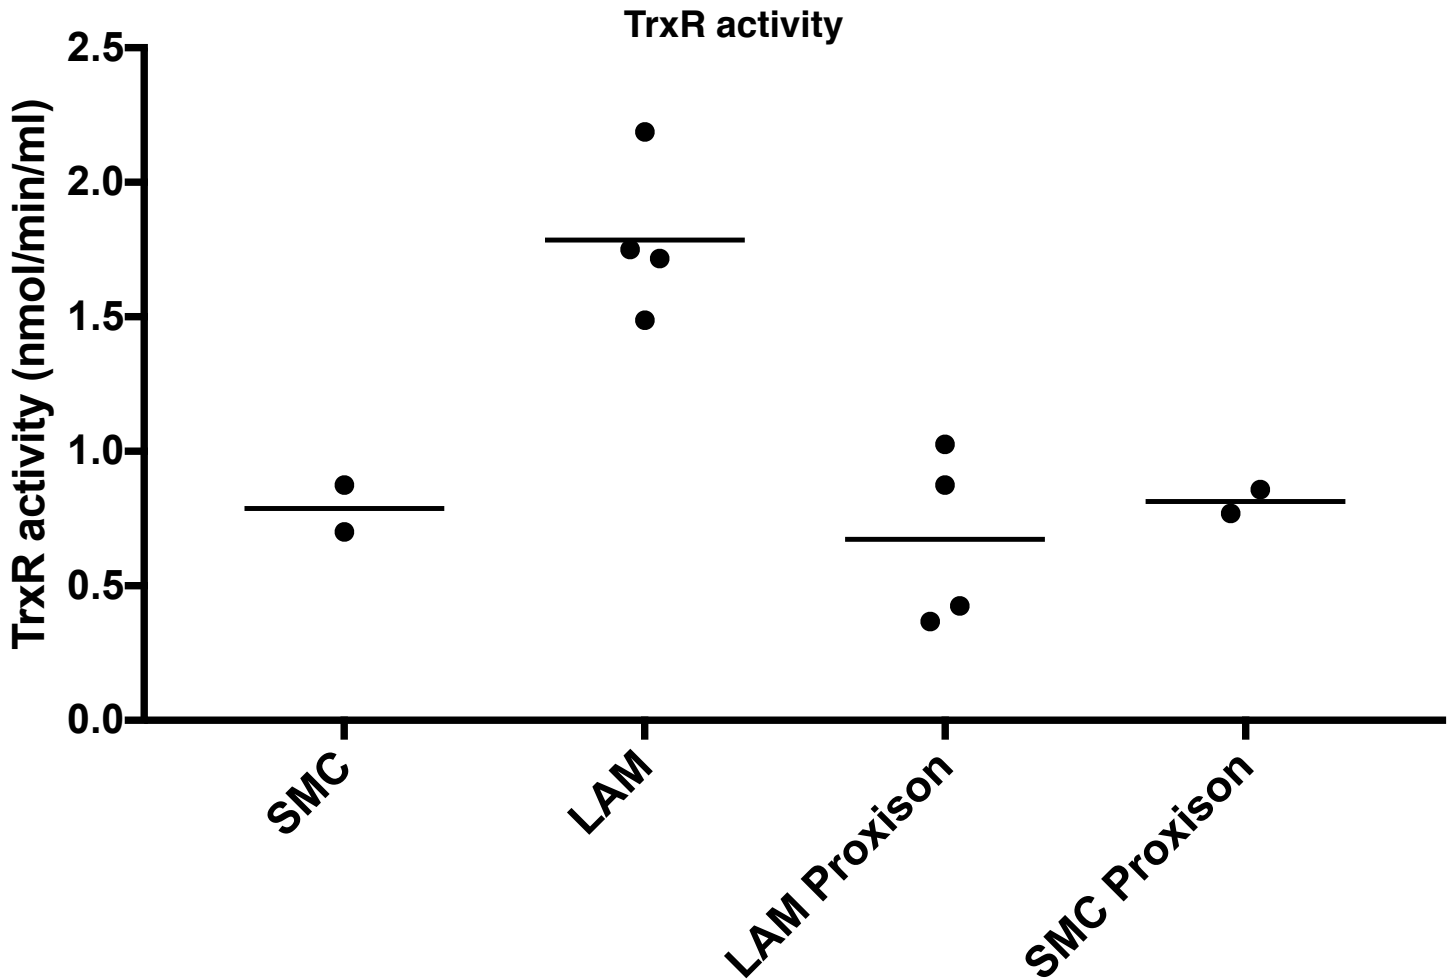

RH-123 fluorescence intensity analysis using flowcytometer

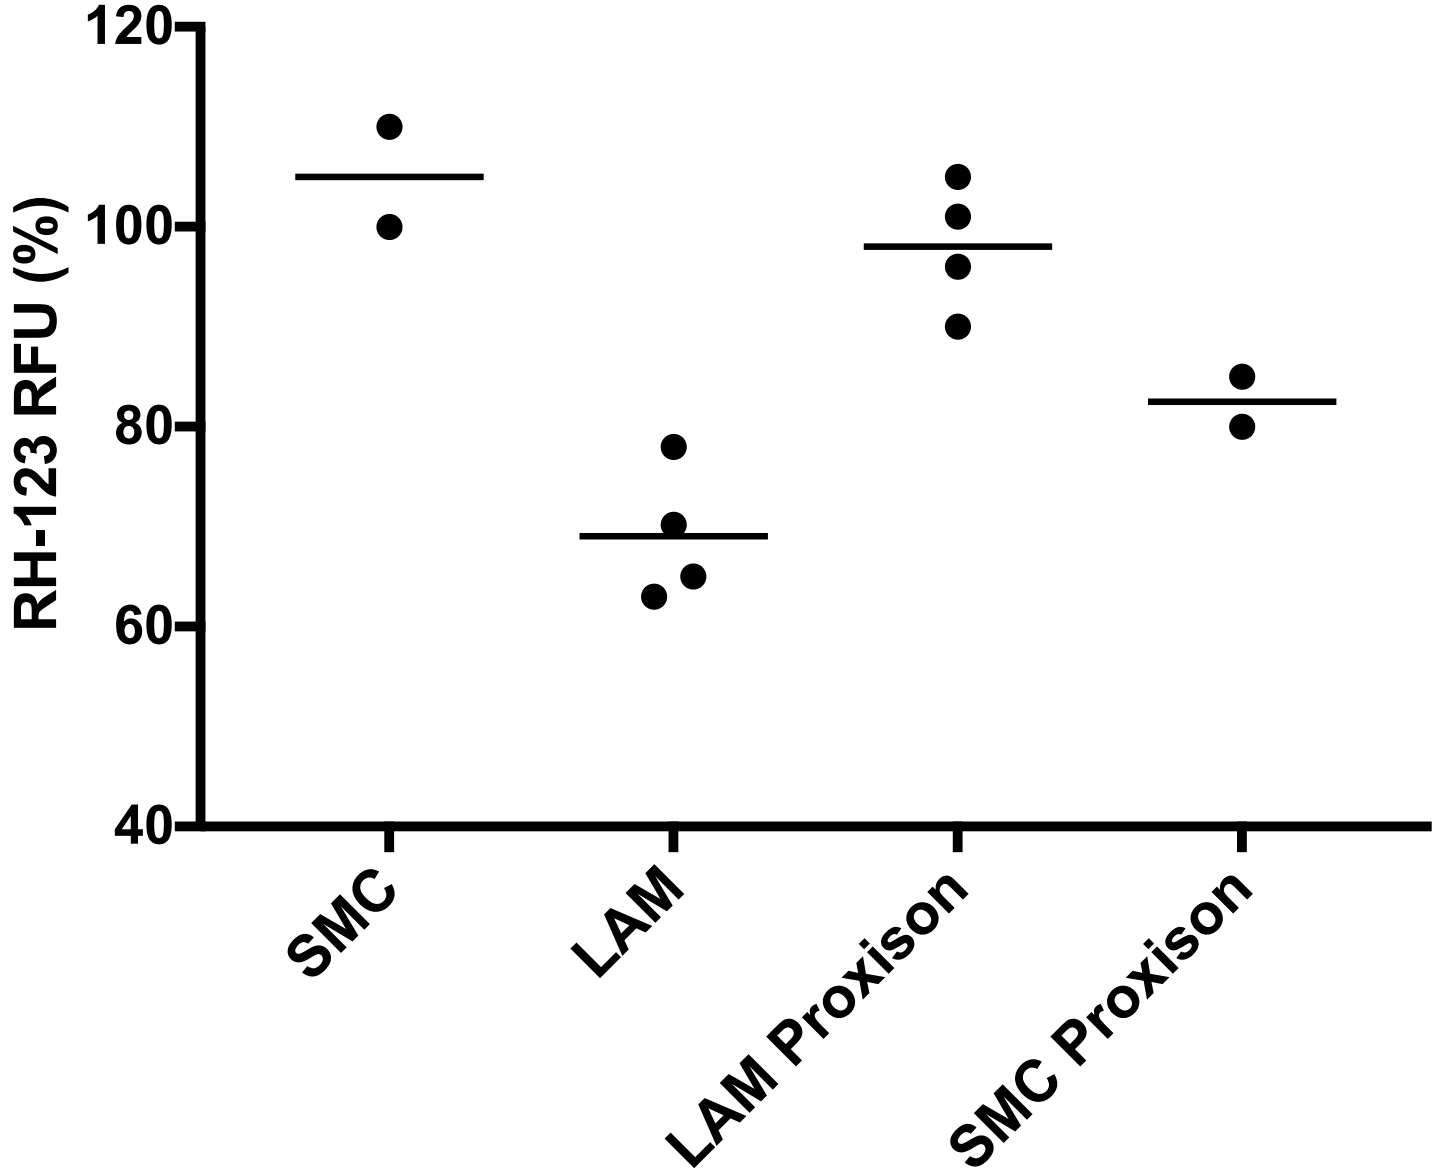

# RH-123 fluorescence intensity analysis using fluorescence microscopy

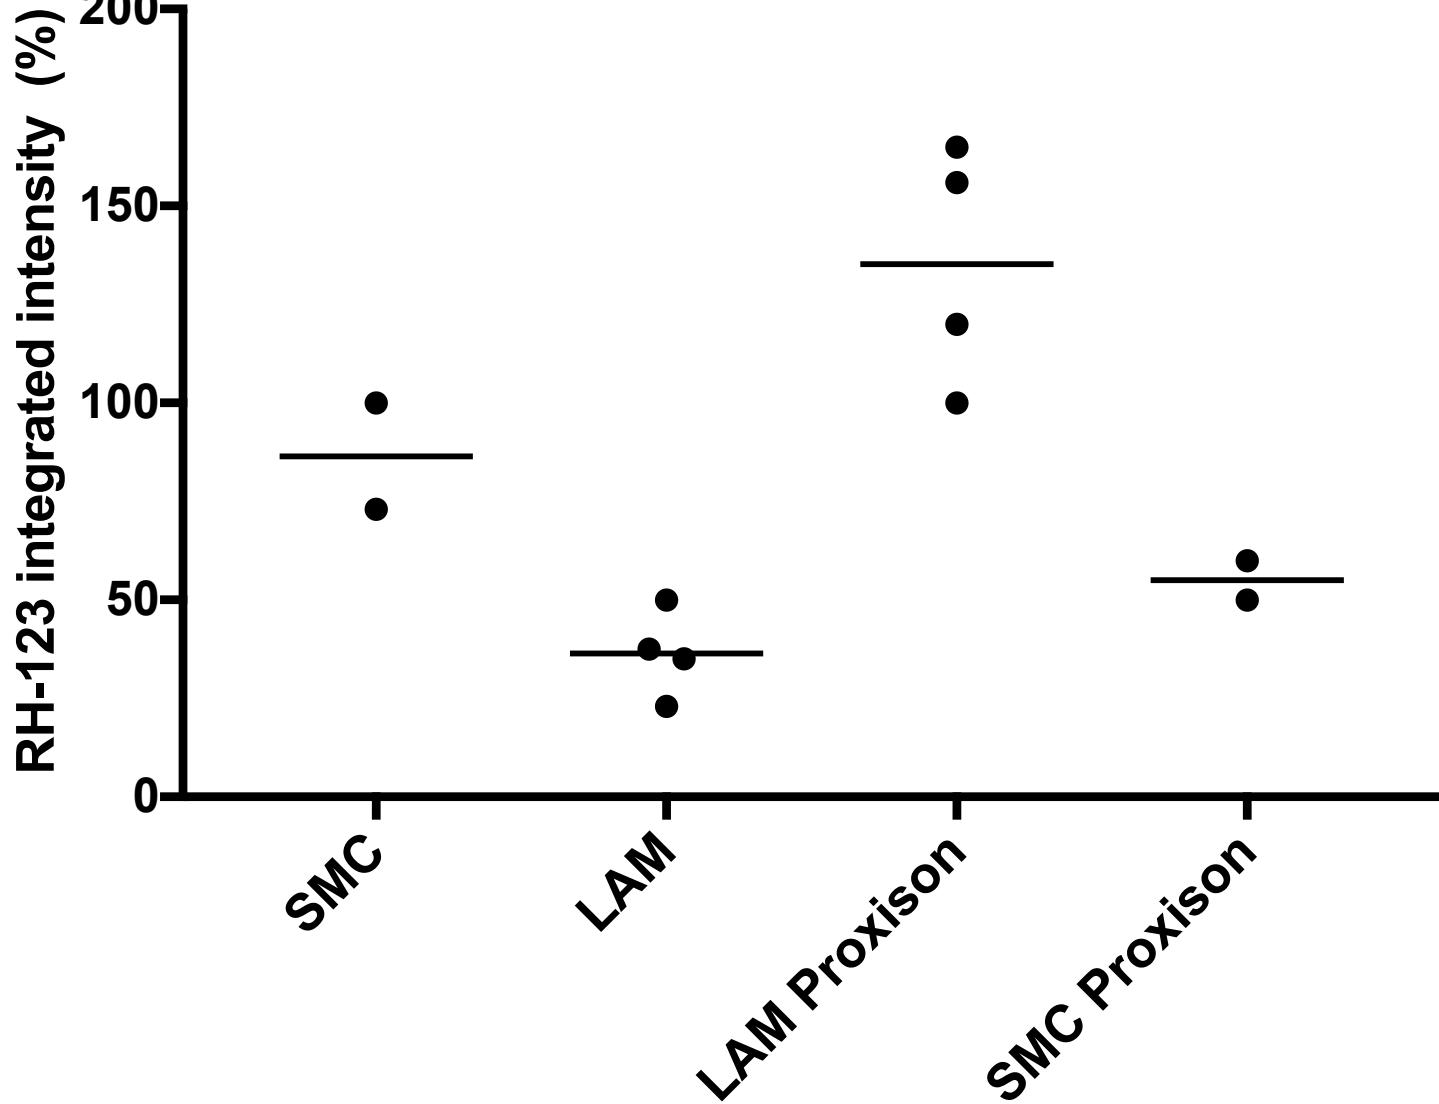

# Scratch assay

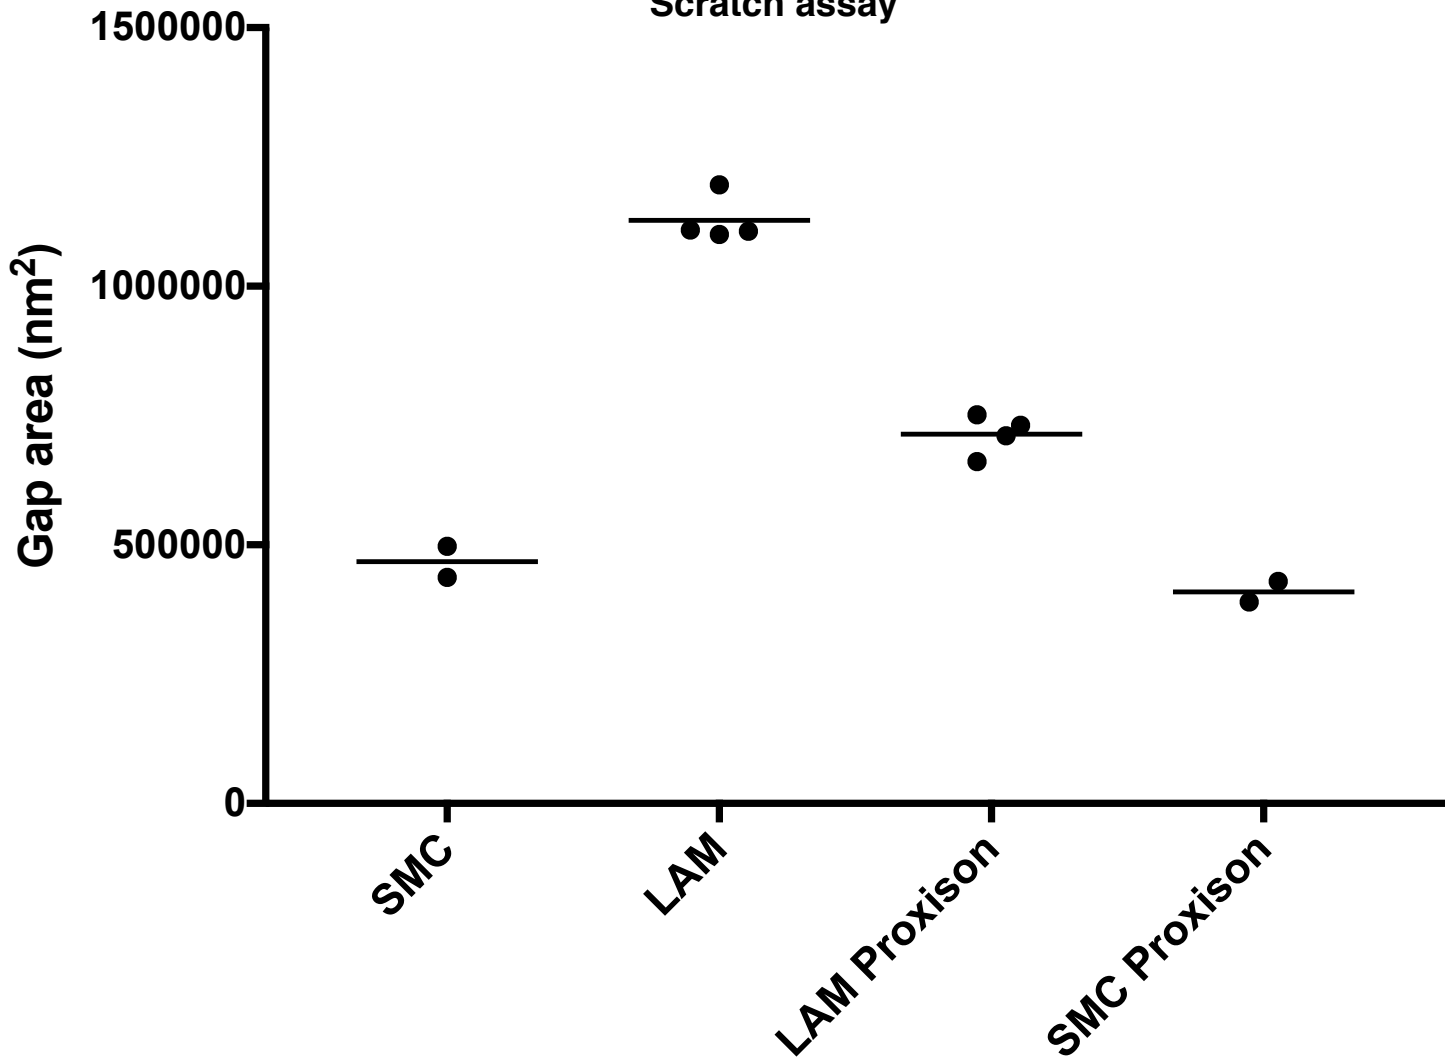

# Migration assay

- Control
- Rapamycin
- ▼ Proxison
- ▲ Rapamycin+Proxison
- ★ Pre-treated Rapamycin+Proxison

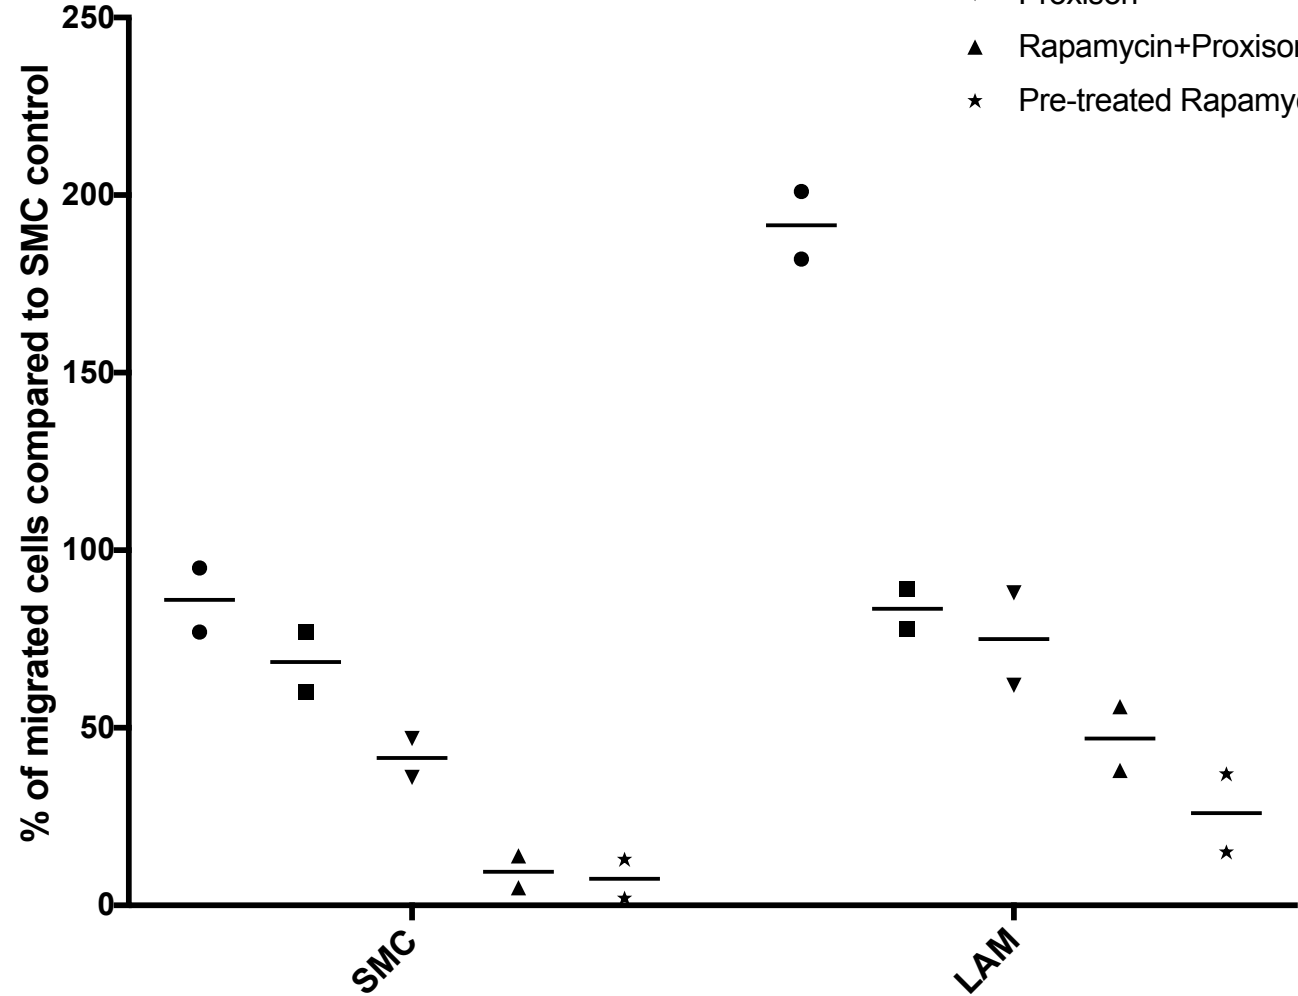

Supplement: 41388_2018_625_MOESM2_ESM.pdf [file 41388_2018_625_MOESM2_ESM.pdf]
