# Supplementary material for: Mitochondrial dysfunction is a key determinant of the rare disease lymphangioleiomyomatosis and provides a novel therapeutic target
Source: PubMed Central journal article supplement (PMC6484686; doi:10.1038/s41388-018-0625-1), 2018-12-20
Supplement: 41388_2018_625_MOESM1_ESM.pdf [file 41388_2018_625_MOESM1_ESM.pdf]

1 **SUPPLEMENTAL MATERIAL**

2 **MATERIALS AND METHODS**

3 **Ethical Statement**

4 Lung tissue samples were obtained from human lung transplant donors, in accordance with the  
5 Declaration of Helsinki and approved by the Institutional Review Board at the University of  
6 Pennsylvania (1). Human tissue was obtained from National Disease Research Interchanged  
7 (NDRI, Philadelphia, PA, USA). LAM patients had given written consent and all the collected  
8 samples were treated anonymously.

9 **LAM cell lines, primary, bronchial Smooth Muscle Cells (SMC) and cell culture conditions**

10 Primary cultures of human LAM cells were established in the Department of Medicine,  
11 University of Pennsylvania, Pennsylvania, USA (1). Briefly, the primary cultures of LAM cells were  
12 dissociated from the LAM nodules of transplant patients. Each LAM nodule was used to establish  
13 individual cell lines (characterized based on alpha smooth muscle actin (ASMA) expression,  
14 mTORC1 activation, HMB45 immunoreactivity, DNA synthesis, TSC2-mTOR-PS6-MLANA genes,  
15 and cell migration) (1, 2). In the current study LAM cell lines were derived from individual patients  
16 and identified as LAM-100, LAM-111C, LAM-D9065 and LAM-HUP. As controls, primary cultures  
17 of normal, human bronchial smooth muscle cells (SMC), were purchased from Lonza (Basel,  
18 Switzerland). Normal, bronchial SMC and LAM cells were cultured at 37°C, 5% CO<sub>2</sub> in SMC Growth  
19 Medium (Lonza, Basel, Switzerland). Primary, normal, bronchial SMC cells from two individual  
20 donors and the four individual cell lines were characterized using ASMA staining and testing  
21 various (PS6, MLANA, mTOR) gene expressions (Supplemental figure 1, Supplemental table1).

22

### 23 **Hematoxylin eosin staining**

24 Cytospins of normal, bronchial SMC and LAM cell lines were stained in Mayer's hematoxylin  
25 solution (Sigma-Aldrich, St. Louis, USA) for 10 min, washed, then differentiated with 0.25% acetic  
26 acid and in eosin solution. Sections were mounted using Vectashield mounting medium (Vector  
27 Laboratories, Burlingame, USA). Images were taken using Nikon Eclipse Ti-U inverted microscope.

### 28 **Electron microscopy**

29 Cells were resuspended in 2.5% glutaraldehyde in 0.1 M sodium-cacodylate buffer (pH 7.4) for  
30 24h, rinsed in 0.1 M sodium-cacodylate buffer and pelleted. The pellet was embedded in Spurr  
31 low-viscosity resin with ERL 4221 used as the epoxy monomer and cured at 70°C for 16h. For  
32 transmission electron microscopy (TEM), 90 nm thick sections were stained with alcoholic uranyl-  
33 acetate and Reynolds lead-citrate and examined using Jeol 1200 and Jeol 1400 transmission  
34 electron microscope (Jeol Ltd, Tokyo, Japan) at 80 kV. Images were acquired using an integrated  
35 MegaView III digital camera (Olympus Soft Imaging Solutions GmbH; Munster, Germany).

### 36 **Proxison treatment**

37 Normal, bronchial SMC and LAM cell cultures were treated with 3 µM Proxison (Antoxis Ltd,  
38 Aberdeen, UK) for 1h at 37°C, 5% CO<sub>2</sub>. In Proxison and Rapamycin combination treatment  
39 (migration assay, mitochondrial genes qRT-PCR), cells were treated with 3 µM Proxison and 20  
40 nM Rapamycin for 24 h at 37°C, 5% CO<sub>2</sub>.

### 41 **Rapamycin treatment**

42 Normal, bronchial SMCs and LAM cell cultures were treated with 20 nM Rapamycin catalog: tlr-  
43 rap (InvivoGen, San Diego, USA) for 24h at 37°C, 5% CO<sub>2</sub> in monotherapy. Rapamycin pre-  
44 treatment was made for 48h (20nM/24h) then 3 µM Proxison was added for an extra 24h.

45

46 **Flow cytometry**

47 Normal, bronchial SMC and LAM cells (100,000) were collected from Proxison treated and control  
48 cultures. Cell cultures were incubated with 2.5  $\mu$ M of Rhodamine 123 (RH-123) (Sigma) for 30  
49 min at 37°C, then cooled to 4°C and washed twice with PBS. Viability was tested using propidium  
50 iodide (PI) staining (Invitrogen, Ltd). Cells were analyzed using FACS Canto II flow cytometer (BD  
51 Immunocytometry Systems, Erembodegen, Belgium) with BD FACS DIVA software V6 and data  
52 were analyzed by FCS Express V3 software.

53 **RH-123 fluorescence microscopy**

54 Normal SMC and LAM cells were cultured for 3 days using Falcon™ chambered cell culture slides  
55 (Thermo Fisher Scientific, Waltham, USA), then treated with Proxison as described above. Images  
56 from living cells were acquired using an Olympus IX-81 (OLYMPUS Corp., Tokyo, Japan) light and  
57 fluorescent microscope, then densitometry was performed.

58 **Immunofluorescent staining**

59 Normal, bronchial SMC and LAM cells were cultured for 3 days using Falcon™ chambered cell  
60 culture slides (Thermo Fisher Scientific, Waltham, USA). Cell cultures were then fixed with 4%  
61 formaldehyde and permeabilized with PBS containing 0.1% Triton-X and 5% BSA. Anti-alpha -  
62 Smooth Muscle Actin Antibody catalog: MAB1420 (R&D Systems) (1 : 100) and anti-mouse Alexa  
63 488 catalog: A28175 (Thermo Fisher Scientific, Waltham, USA) (1:200) were used for  
64 immunofluorescent staining. Nuclei were counter stained with DAPI. Images were acquired using  
65 an Olympus IX-81 (OLYMPUS Corporation, Tokyo, Japan) both light and fluorescence microscope.

66

67 **Migration assay**

68 200,000 cells of both normal SMC and LAM cell lines were seeded in serum-free media using  
69 various treatments in the upper chamber of the Transwell migration plate. The pore size of the  
70 membrane was 8.00µm (24-well format, Costar, Corning Incorporated). The chambers were  
71 incubated at 37°C for 16 h. Chambers were fixed in PBS containing 4% paraformaldehyde, stained  
72 with DAPI and membranes were mounted to microscopic slides (supplemental figure 6). Images  
73 were acquired using an Olympus IX-81 (OLYMPUS Corporation, Tokyo, Japan). The number of  
74 migrated cells was analyzed using ImageJ particular analyzer.

75 **RNA isolation**

76 Total RNA was extracted from normal SMC and LAM cell cultures with MN NucleoSpin RNA  
77 isolation kit according to the manufacturer's protocol (Macherey-Nagel, Düren, Germany). The  
78 concentration of RNA samples was measured using NanoDrop (Thermo Fisher Scientific,  
79 Waltham, USA).

80 Total RNA from human lung tissues were obtained using TRIzol reagent (Invitrogen, Thermo  
81 Fisher Scientific, Waltham, USA). RNA (1 µg) was digested with DNase (Sigma-Aldrich, St. Louis,  
82 USA) to avoid DNA contamination.

83 **TaqManArray, Nanostring and Quantstudio chips**

84 *Human Nuclear Receptors TaqMan®Array*

85 cDNA was synthesized with high capacity RNA to cDNA kit (Thermo Fisher Scientific, Waltham,  
86 USA). Reverse transcription was performed with random hexamer primers. Each sample was  
87 mixed with TaqMan Universal Master Mix (Thermo Fisher Scientific, Waltham, USA). TaqMan PCR

88 reaction was performed using ABI StepOnePlus system and data were analyzed with StepOne  
89 software. MicroRNA expression was normalized to U6 expression.

#### 90 *Nanostring*

91 100 ng of total RNA/cell culture was isolated and analyzed using the nCounter Analysis System  
92 (NanoString Technologies) and the nCounter Human v2 miRNA Panel containing 798 unique  
93 miRNA barcodes. Copy count assay was performed using the Nanostring ncounter SPRINT.  
94 Analysis was performed using the Nsolver software.

#### 95 *Quantstudio 12k flex*

96 cDNA was prepared using TaqMan miRNA reverse transcriptase kit and Megaplex RT primers Pool  
97 A and B (Thermo Fisher Scientific, Waltham, USA) according to manufacturers' protocol using  
98 350ng-1000ng of total RNA as starting material. miRNA expression levels were performed using  
99 open array miRNA card Pool A and B and Quantstudio 12k flex (Thermo Fisher Scientific,  
100 Waltham, USA).

#### 101 **Protein array**

##### 102 *Angiogenesis array*

103 Cell lysates of  $1 \times 10^7$  cells/ml were assessed using a Human Angiogenesis Array Kit (R&D Systems,  
104 Minneapolis, USA). Protein concentration was determined using a fluorescent protein assay  
105 (Qubit Protein, Thermo Fisher Scientific, Waltham, USA). Briefly, the Detection Antibody Cocktail  
106 was mixed with each sample and incubated with the membrane at 4°C overnight, then with  
107 Streptavidin-HRP at room temperature finally with the Chemiluminescent-Reagent Mix. Images  
108 were captured using LAS-4000 (GE Healthcare Bio-Sciences AB Uppsala, Sweden), and intensity  
109 was determined using ImageJ (<https://imagej.nih.gov/ij/>) and normalized to the reference spots.

110 **Quantitative qRT-PCR**

111 cDNA was synthesized as described above. qRT-PCR was performed using SensiFAST SYBR Green  
 112 reagent (BioLine, London, UK) in an ABI StepOnePlus system. Gene expressions using sequence  
 113 specific primers (Table 1) were analyzed with StepOne software and normalized to beta-actin as  
 114 a housekeeping gene. Changes in gene expression were calculated according to the  $2^{-\Delta\Delta C_t}$  method.

115

| <b>Gene name<br/>(abbreviation)<br/>Accession code</b> | <b>Forward primer</b> | <b>Reverse primer</b>  |
|--------------------------------------------------------|-----------------------|------------------------|
| beta-actin<br>NM_001101.4                              | GCGCGGCTACAGCTTCA     | CTTAATGTCACGCACGATTTCC |
| NRF1<br>NM_005011.4                                    | CAGCCGCTCTGAGAACTTCA  | TTCCCGCCCATGCTGTTTAT   |
| Cyt C<br>NM_018947.5                                   | TCAGGCCCTGGATACTCTT   | AAGTCTGCCCTTTCTTCCTTC  |
| COX4<br>NM_001318797.1                                 | GTTTCACCGCGCTCGTTATC  | TTGGCCACCCACTCTTTGTC   |
| VEGFD<br>NM_004469.4                                   | GAACACCAGCACCTCGTACA  | ACAGACACACTCGCAACGAT   |
| VEGFC<br>NM_005429.4                                   | CCCGCCTCTCAAAAAGCTA   | TGGACACAGACCGTAACTGC   |
| VEGFA<br>NM_001204384.1                                | TTCTGGGCTGTTCTCGCTTC  | TTGTACATACGCTCCAGGAC   |
| VEGFR1<br>NM_017020485.1                               | ACCATACCTCCTGCGAAACC  | TCAGAGGCCCTTTCAGCATT   |
| VEGFR2<br>NM_002253.3                                  | CGGTCAACAAAGTCGGGAGA  | CAGTGCACCACAAAGACACG   |
| VEGFR3<br>NM_001354989.1                               | TGTACACCACGCAGAGTGAC  | AGCCTTTGTAGGTCGTTGGG   |
| TFAM<br>NM_003201.2                                    | CTCCGCAGGCTAGAGGATTG  | CAGCTTTTCTGCGGTGAAT    |

|                           |                           |                           |
|---------------------------|---------------------------|---------------------------|
| TSC1<br>NM_001162427.1    | TGCTGTACGTCCAAGATGGC      | TTACAAGCATAGGGCCACGG      |
| TSC2<br>NM_001363528.1    | GGCGGCACAGAACTACAAC       | GGAATTCCGAGGACAAGCCA      |
| HIF1-alpha<br>NM_001530.3 | GTCTGAGGGGACAGGAGGAT      | GCACCAAGCAGGTCATAGGT      |
| ESR1<br>NM_000125.3       | GACTGCACTTGCTCCCGT        | CCACTTCGTAGCATTTGCGG      |
| THRB<br>NM_001354712.1    | AGGGCACTGGTAATTTGGCT      | TGGCTTTGTCACCACACACT      |
| NR0B1<br>NM_000475.4      | GACTGTGGAAGTCTCGGAGC      | ACTTGATGGCTTGGACCTGG      |
| NR5A2<br>NM_205860.2      | CCCAAGGCCACGAAATTTGA      | GCCCAGCACCAATAGGTGTAA     |
| ESRRG<br>NM_001438.3      | AATAATGGTTGCCGGTCGCA      | TGCAGAGAAGCTCTTCCTCGTAG   |
| AHR<br>NM_001621.4        | CCACTTCAGCCACCATCCAT      | AAGCAGGCGTGCATTAGACT      |
| MLANA<br>NM_005511.1      | CTGCTCATCGGCTGTTGGTA      | GAGACACTTTGCTGTCCCGA      |
| MTOR<br>NM_004958.3       | TTGAGGTTGCTATGACCAGAGAGAA | TTACCAGAAAGGACACCAGCCAATG |
| RPS6<br>NM_001010.2       | TGTTACTCCACGTGTCCTGC      | AAGTCTGCGTCTCTTCGCAA      |
| RARB<br>NM_000965.4       | ATGATTCGGGGCTGGGAAAAA     | AGGGTAAGGCCGTCTGAGAA      |
| PGR<br>NM_001202474.3     | TGCCTGAAGTTTCGGCCATA      | AAGCGGGAATCTTCCTTGGG      |

116

117

118 **Supplemental Table 1.:** Quantitative qRT- PCR primers.

119

120

121 **Artificial neural network (ANN) analysis**

122 Gene expression data of nuclear receptors and angiogenesis protein array was evaluated using a  
123 feed forward artificial neural network (ANN) (Neurosolutions 6, NeuroDimension Inc.) software  
124 (5-9).

125 **Metabolic profiling**

126 *Metabolic profiling using SeaHorse XF96*

127 Normal SMC and LAM metabolic profiles were generated using the Seahorse X96 platform  
128 (Agilent Technologies, USA) (3). Briefly, cells were plated into Seahorse cell plates, then at 90%  
129 confluence and after recording baseline oxygen consumption, cells were treated with butyryl-  
130 cAMP (500  $\mu$ M), oligomycin (2  $\mu$ M) and antimycin (10  $\mu$ M). Antimycin-resistant oxygen  
131 consumption was considered as. Baseline oxygen consumption and membrane leak (OCR after  
132 oligomycin treatment) was calculated. Glycolysis was assessed through the extracellular  
133 acidification value (ECAR) and ECAR/OCR values were calculated.

134 *Metabolic profiling using Oroboros*

135 LAM and normal SMCs respiration was measured using a high resolution Oxygraph-2k (O2k,  
136 OROBOROS Instruments, Innsbruck, Austria) (4). Oxygraph-2k chambers were filled with  
137 respiration medium and the chamber was allowed to equilibrate and the baseline built. Cells  
138 (10,000,000) in smooth muscle growth medium from both SMC and LAM were injected into the  
139 chamber. To generate a closed system Antimycin was inserted to stop cellular oxygen  
140 consumption (4).

141

142



143 **TRXR activity**

144 Cell lysates ( $1 \times 10^7$  cells/ml) were collected to assess TrxR activity using a Thioredoxin  
145 Reductase Assay Kit (Abcam, Cambridge, MA, USA). Protein concentration was determined  
146 (Qubit Protein, Thermo Fisher Scientific, Waltham, USA), then a TrxR activity assay was  
147 performed according to the manufacturer's instructions. OD was measured at 412 nm.

148 **Statistical analysis**

149 Statistical analysis was performed with SPSS version 20 software. Data were generated from an  
150 average of 3 technical repeats on LAM (n=4) compared to normal SMC (n=2)  $\pm$  standard error  
151 of mean (SEM) are presented, and statistical analysis was performed using the independent  
152 samples t-test and one-way ANOVA with Bonferroni correction.  $p < 0.05$  was  
153 considered as significant. For detailed variation within each sample refer to supplementary pdf  
154 individual data point file.

155

156

157 **References**

- 158 1. Goncharova EA, Goncharov DA, Eszterhas A, Hunter DS, Glassberg MK, Yeung RS *et al.*  
159 Tuberin regulates p70 S6 kinase activation and ribosomal protein S6 phosphorylation: A  
160 role for the TSC2 tumor suppressor gene in pulmonary lymphangioleiomyomatosis (LAM).  
161 *J Biol Chem* 2002; **277**: 30958–30967.
- 162 2. Goncharova EA, Goncharov DA, Lim PN, Noonan D, Krymskaya VP. Modulation of cell  
163 migration and invasiveness by tumor suppressor TSC2 in lymphangioleiomyomatosis. *Am*  
164 *J Respir Cell Mol Biol* 2006; **34**: 473–480.
- 165 3. Kristóf E, Doan-Xuan Q-M, Bai P, Bacso Z, Fésüs L. Laser-scanning cytometry can quantify  
166 human adipocyte browning and proves effectiveness of irisin. *Sci Rep* 2015; **5**: 12540.
- 167 4. Pesta D, Gnaiger E. High-Resolution Respirometry: OXPHOS Protocols for Human Cells and  
168 Permeabilized Fibers from Small Biopsies of Human Muscle. In: *Methods in molecular*  
169 *biology (Clifton, N.J.)*. 2012, pp 25–58.
- 170 5. Lippman R. "An introduction to computing with neural nets." *IEEE Trans. ASSP Magazine*  
171 *4*, 4-22, 1987.
- 172 6. Hopfield J. "Neural networks and physical systems with emergent collective computational  
173 abilities." *Proc. Natl. Acad. Sci. (USA)* **79**, 2554-2558, 1982.
- 174 7. Sharmistha P. Chatterjee, Abhijit S. Pandya,  
175 Chapter 12 - Artificial Neural Networks in Drug Transport Modeling and Simulation–II,  
176 Editor(s): Munish Puri, Yashwant Pathak, Vijay Kumar Sutariya, Srinivas Tipparaju, Wilfrido  
177 Moreno, Artificial Neural Network for Drug Design, Delivery and Disposition,  
178 Academic Press, 2016, Pages 243-261, ISBN 9780128015599,
- 179 8. Jihua Huang, Hiroshi Shimizu, Suteaki Shioya,  
180 Gene network Analysis by a Self-Organizing Map and an Artificial Neural Network,  
181 IFAC Proceedings Volumes, Volume 37, Issue 3, 2004, Pages 275-280, ISSN 1474-6670,
- 182 9. Motalleb G: Artificial neural network analysis in preclinical breast cancer. *Cell J*. 2014  
183 Winter;15(4):324-31. Epub 2013 Nov 20.

184

185

186 Supplemental Figure 1.

187 A

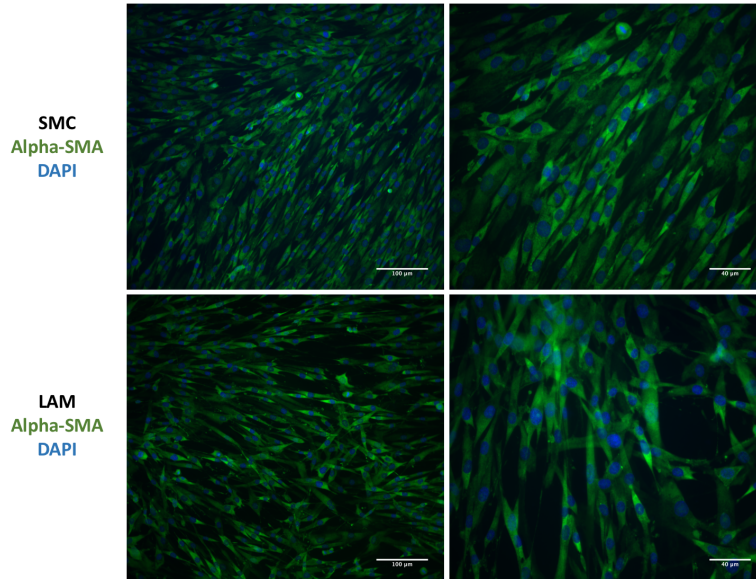

188  
189

B

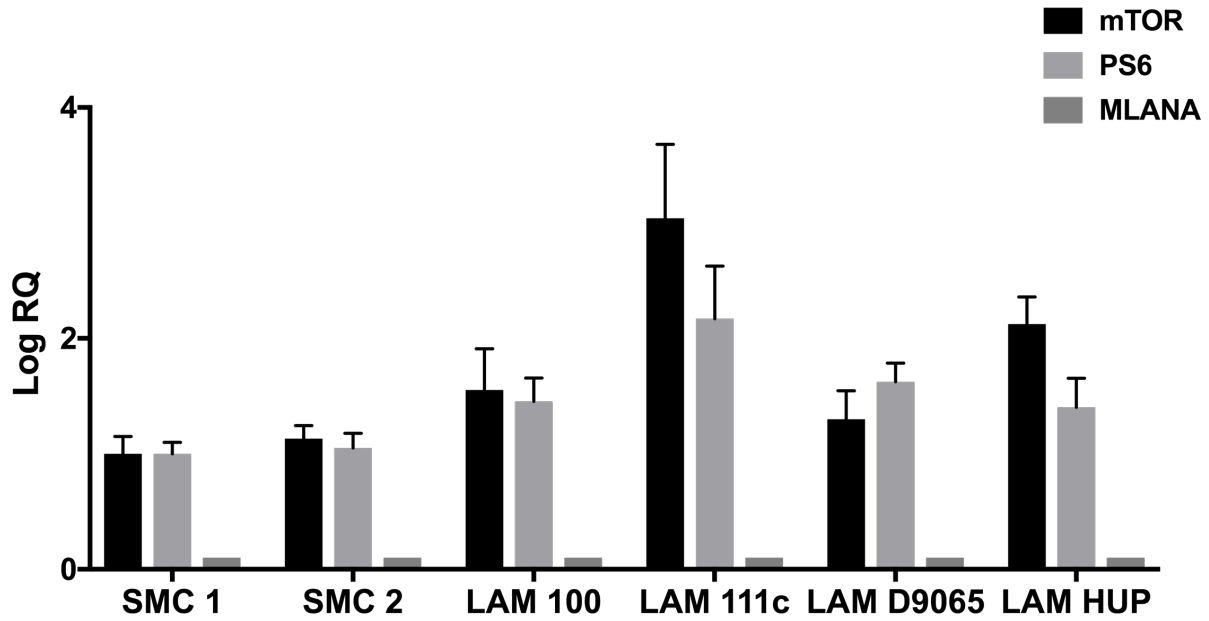

190  
191  
192

193 c

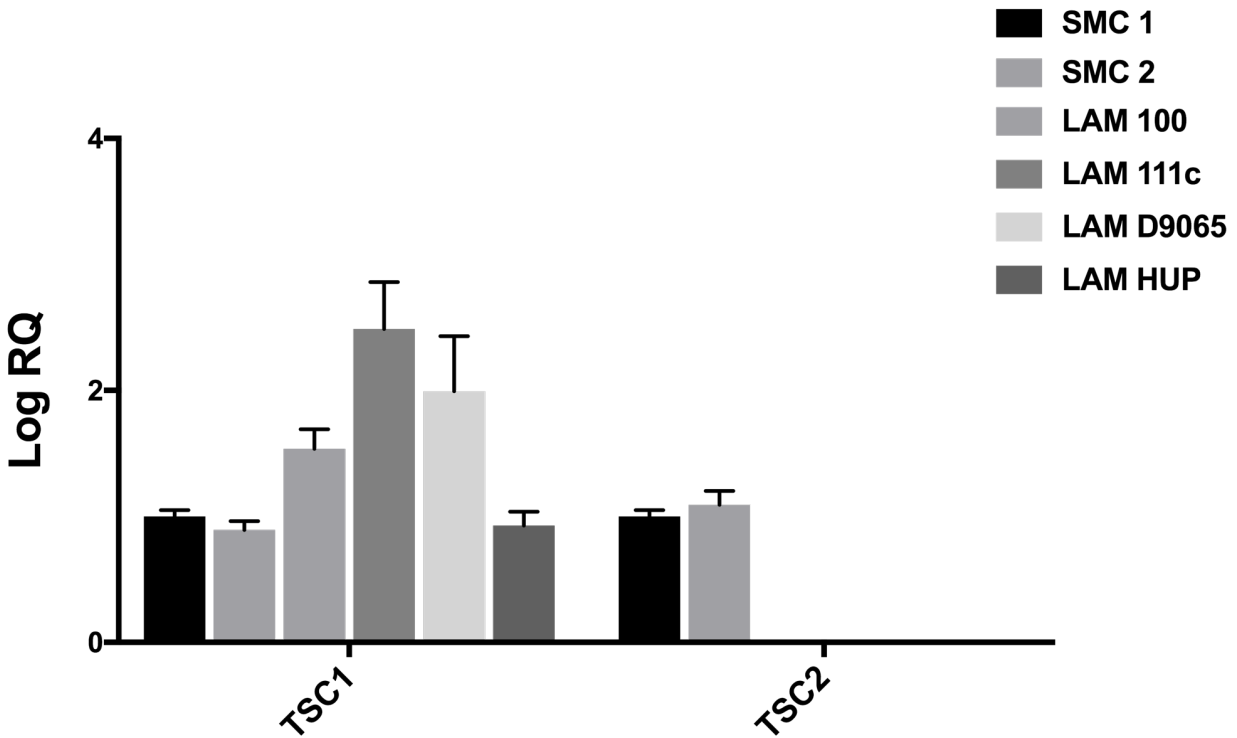

194  
195  
196  
197

**Supplemental Figure 1. Characterization of normal bronchial SMC cells (n=2) and individual patient derived LAM cell lines (n=4). A)** ASMA immunofluorescent staining (ASMA green, DAPI blue, objective 20x and 40x, size-bar 100  $\mu$ m and 40  $\mu$ m). Each staining is a representative of n=3 technical repeats on SMC (n=2) and LAM (n=4) cell lines each. **B)** qRT-PCR analysis of mTOR, MLANA and PS6 genes. Beta-actin was used as inner control. Data are presented as mean of log RQ  $\pm$  technical error of the replicates. **C)** qRT-PCR analysis of TSC 1 and 2 genes. Beta-actin was used as inner control, loss of TSC2 gene expression was significant in LAM patient cell lines. Data are presented as mean of log RQ  $\pm$  technical error of the replicates.

205

206

207 Supplemental Figure 2.

208 **A**

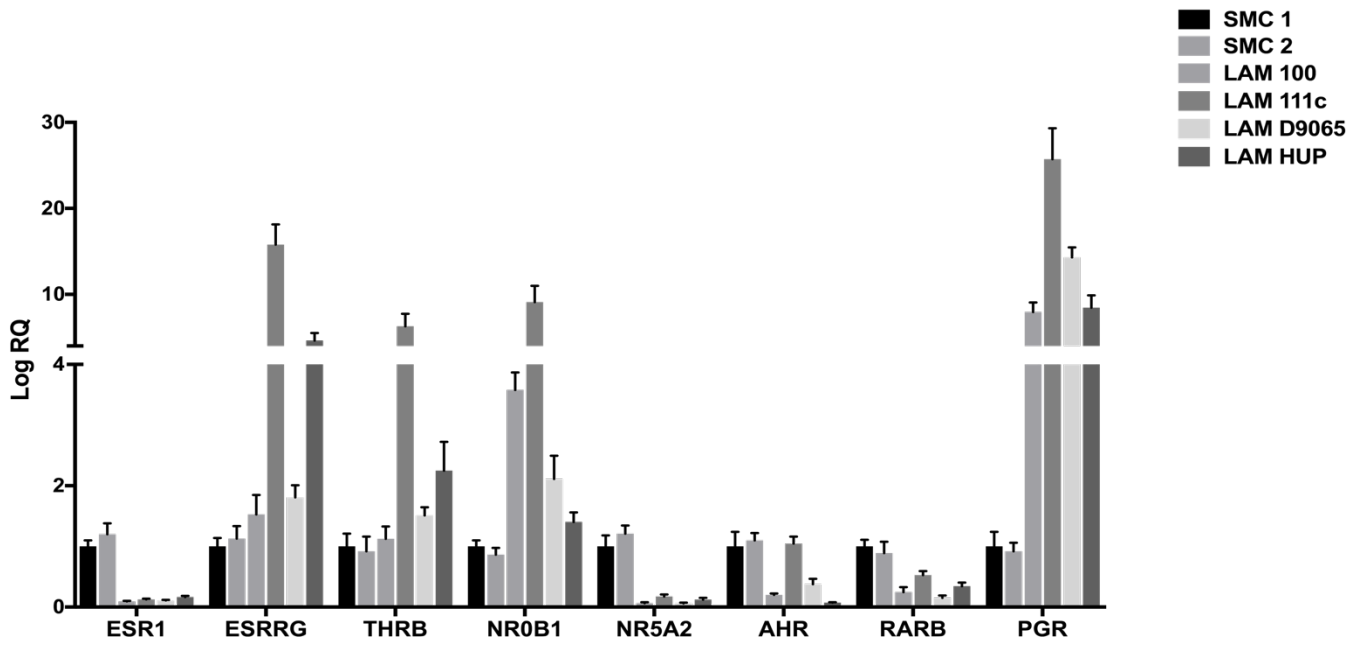

209

210

211 **B**

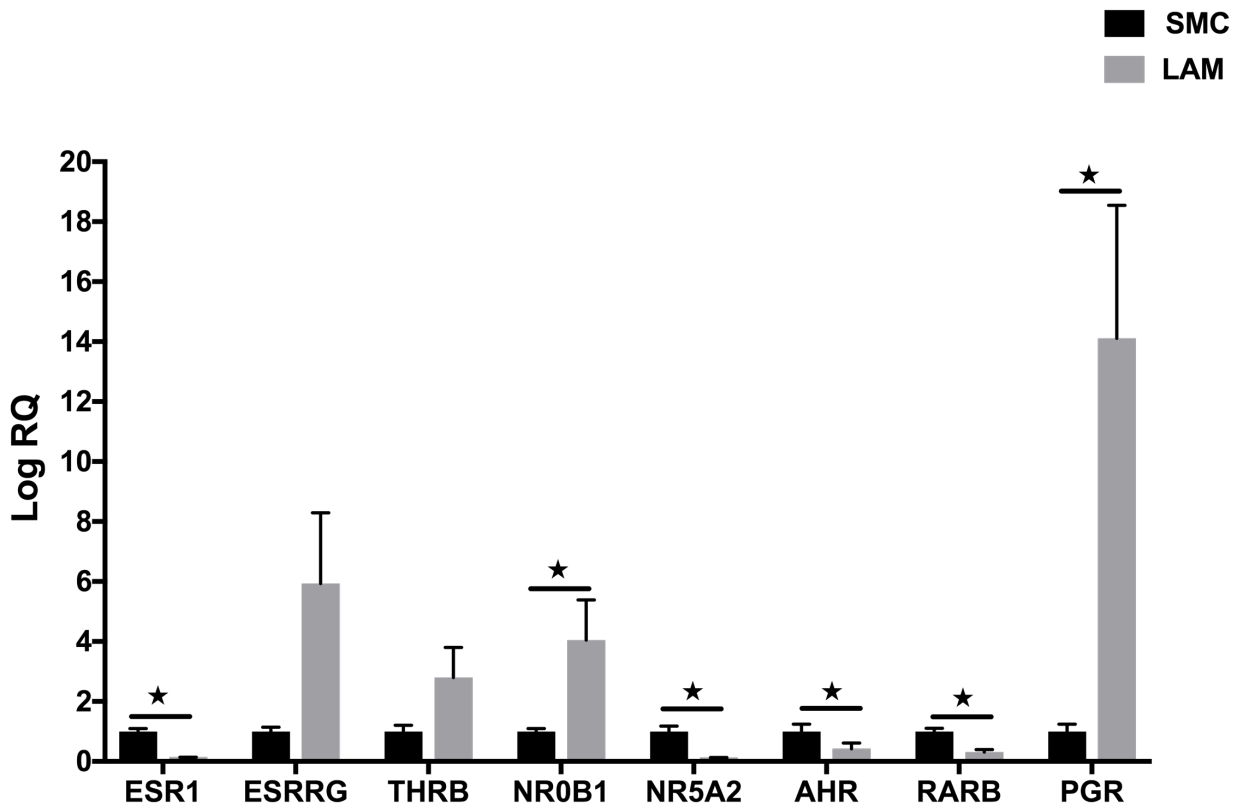

212

213

214 **Supplemental Figure 2. qRT-PCR analysis of nuclear receptors on individual LAM samples and**  
215 **normal SMC samples. A)** qRT-PCR analysis of ESR1, ESRRG, PGR, THRB, NROB1, NR5A2, AHR and  
216 RARB genes. Beta-actin was used as inner control. Data are presented as mean of log RQ  $\pm$   
217 technical error of the replicates (SMC n=2). **B)** Data are presented as mean of log RQ $\pm$ SEM SMC  
218 (n=2) and LAM (n=4). Significant changes are marked as ★ (P<0.05).

219

220  
221

Supplemental figure 3.

A

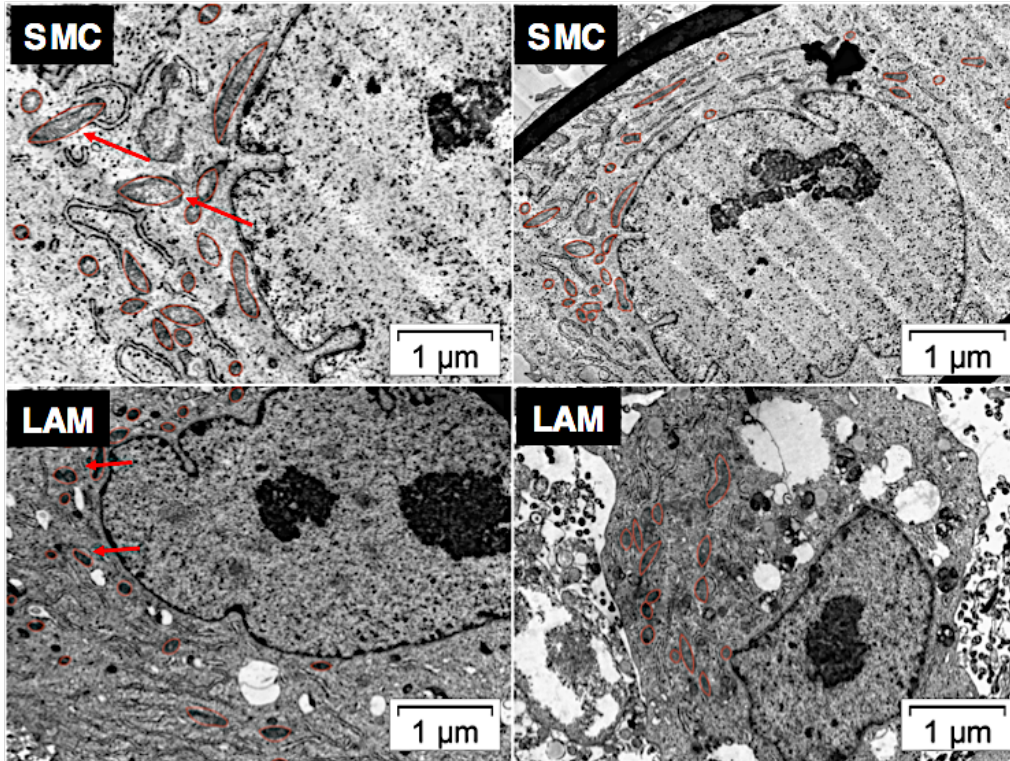

223  
224  
225  
226  
227  
228  
229  
230  
231  
232  
233  
234  
235  
236  
237  
238  
239  
240  
241

B

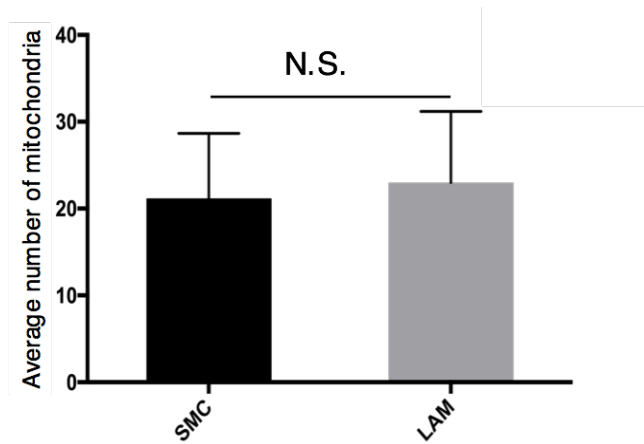

242  
243  
244

Supplemental Figure 3. Electron microscopic pictures of a normal SMC control and a LAM cell.

245

A) Mitochondria are circled and red arrows point at them out (size bar 1 μm); B) Average count

246

of mitochondria in electron microscopic images of normal SMC control (n=2, number of

247 images=11) and LAM cell types (n=4, number of images=18). Mitochondrial counts were  
248 generated using ImageJ. Data are shown as average mitochondria  $\pm$  SEM.

249



250 **Supplemental figure 4.**

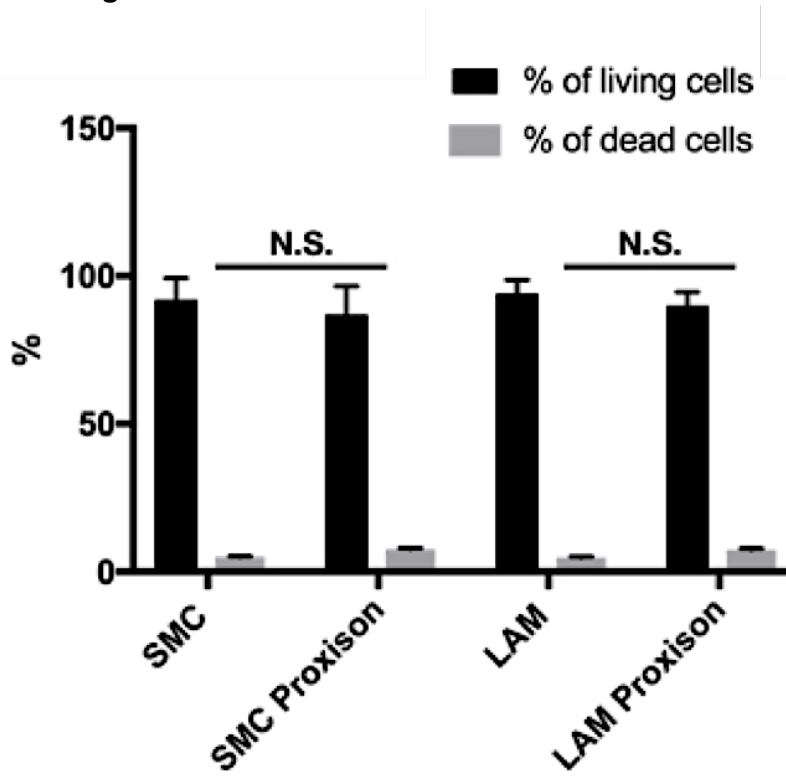

251  
252  
253

**Supplemental Figure 4. Proxison is not toxic in cell cultures.** After Proxison (3  $\mu$ M, 1 h) treatment viability of normal SMC (n=2) and LAM cell lines (n=4) were determined using propidium iodide (PI) (500 nM) then fluorescence intensity was analyzed by flow cytometry. Data are presented as percentage of viability in 10,000 cells  $\pm$  SEM.

257  
258  
259  
260  
261  
262  
263  
264  
265  
266  
267  
268

Supplemental Figure 5.

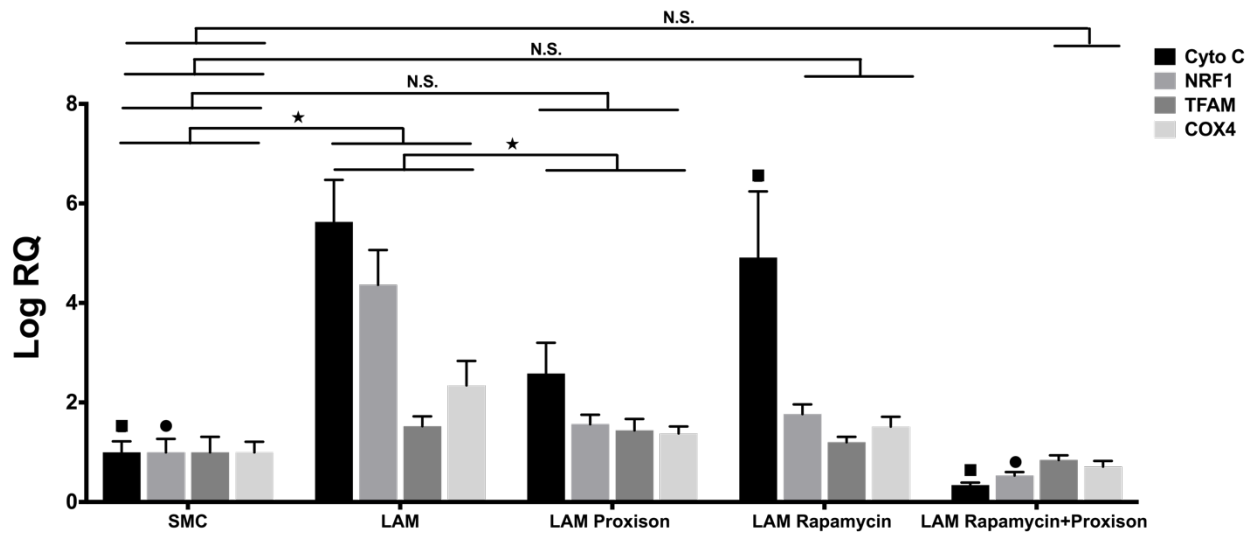

**Supplemental Figure 5. Mitochondrial gene expression changes following Proxison and Rapamycin treatment.** Gene expression in the mitochondria of LAM cell lines (n=4) were compared to normal SMCs (n=2) following Proxison (3  $\mu$ M, 24h), Rapamycin (20 nM, 24h) and Rapamycin (20 nM, 24h) + Proxison (3  $\mu$ M, 24h). Data are presented as mean of log RQ  $\pm$  SEM, significant changes are marked as  $\star$  (P<0.05).

Supplemental Figure 6.

A

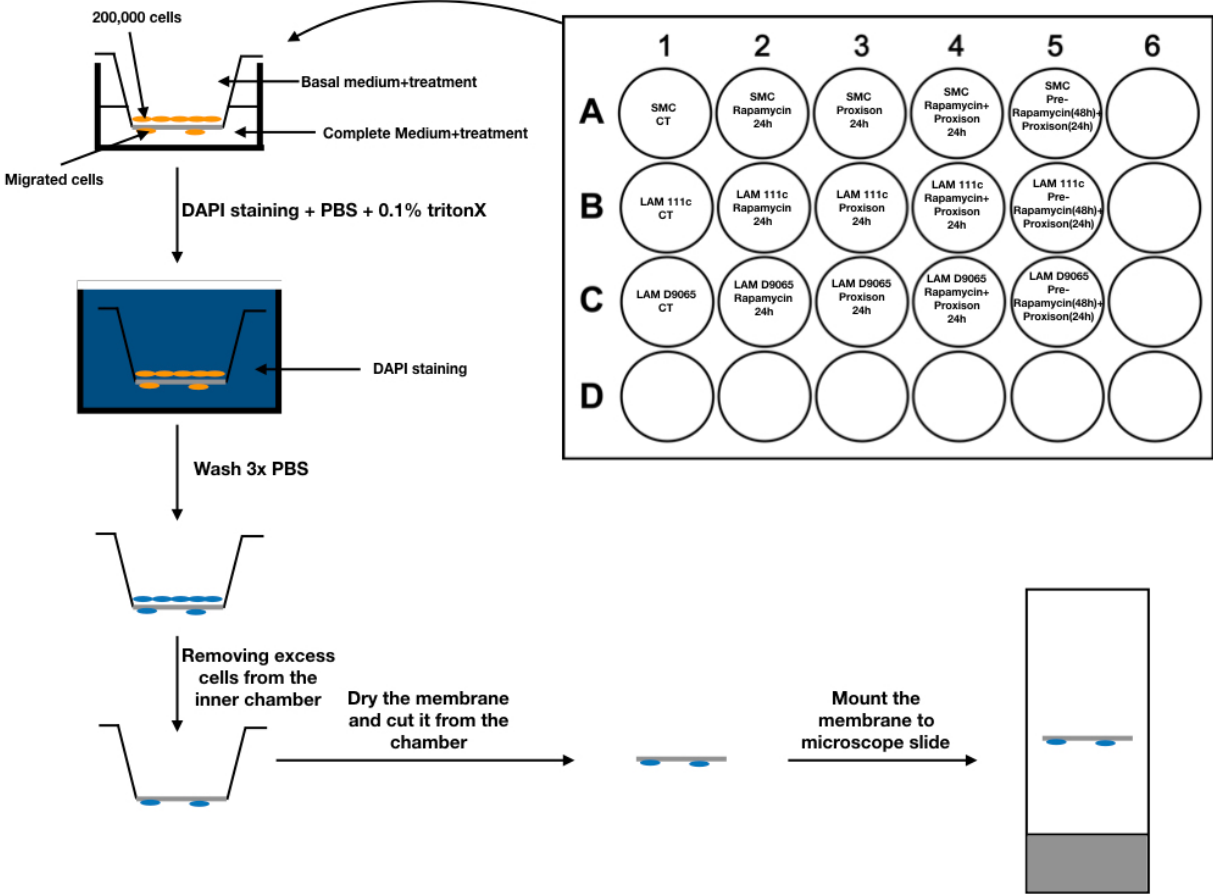

**B**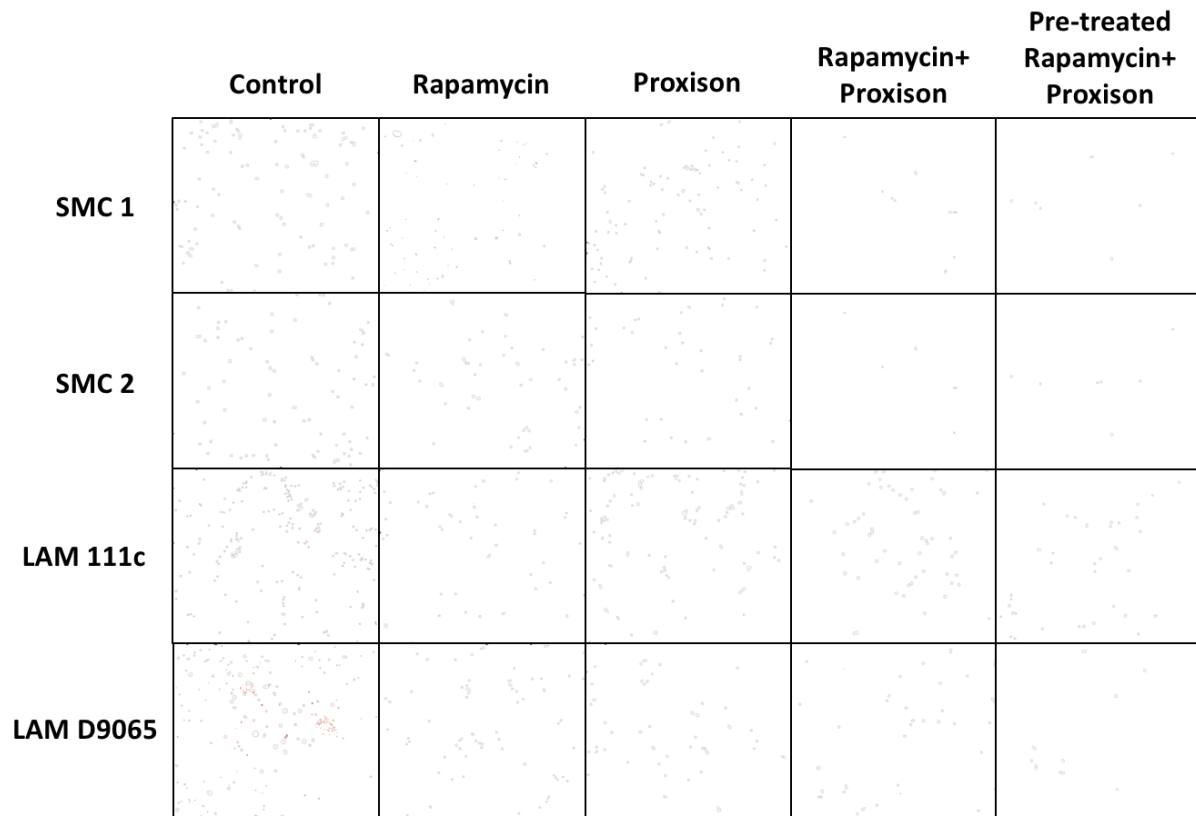**C**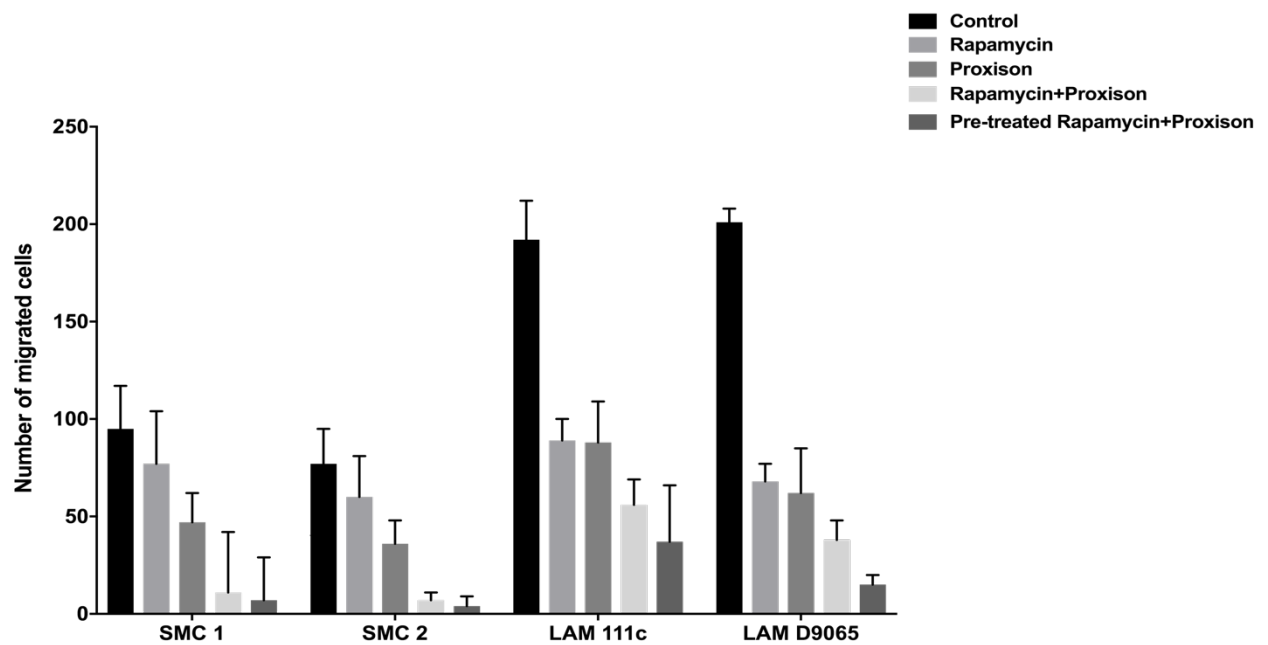

**Supplemental Figure 6. Migration assay. A)** Schematic representation of the migration assay design and treatment strategies. **B)** Migration capacity of LAM cell lines following different treatment strategies Rapamycin (20 nM, 24h), Proxison (3  $\mu$ M, 24h), Rapamycin (20 nM, 24h) + Proxison (3  $\mu$ M, 24h) and pre-treated with Rapamycin for 48h (20 nM/24h) + Proxison (3  $\mu$ M, 24h), images presented as the number of cells migrated through the membrane to the lower side of the chamber and stained with DAPI. **C)** Data are presented as percentage of migrated cells compared to normal SMC  $\pm$  technical error of the replicates.

| GENE     | GENE NAME                                                                  | FOLD CHANGE IN GENE EXPRESSION |
|----------|----------------------------------------------------------------------------|--------------------------------|
| AHR      | Aryl hydrocarbone receptor                                                 | 0.246833042                    |
| COP92    | COP9 signalosome subunit 2                                                 | 0.490569164                    |
| ESR1     | <b>Estrogen Receptor</b>                                                   | <b>0.248859347</b>             |
| ESRFB    | Estrogen receptor-related receptor beta                                    | 0.535669413                    |
| ESRFG    | <b>Estrogen receptor-related receptor gamma</b>                            | <b>7.969892372</b>             |
| HDAC2    | Histone deacetylase 2                                                      | 2.014278883                    |
| HDAC4    | Histone deacetylase 4                                                      | 0.496454272                    |
| HDAC6    | Histone deacetylase 6                                                      | 2.016007928                    |
| HDAC7    | Histone deacetylase 7                                                      | 0.495877676                    |
| HMG1     | High mobility group AT-hook 1                                              | 2.003069563                    |
| HNF4A    | <b>Hepatocyte nuclear factor alpha</b>                                     | <b>0.244270055</b>             |
| HNF4G    | <b>Hepatocyte nuclear factor gamma</b>                                     | <b>0.251666716</b>             |
| KAT5     | Lysine acetyltransferase 5                                                 | 2.041409783                    |
| ITGB3BP  | Integrin subunit beta 3 binding protein                                    | 1.989164659                    |
| MED24    | Mediator Complex Subunit 24                                                | 2.031083036                    |
| NCOA1    | Nuclear receptor coactivator                                               | 0.491716524                    |
| NCOA2    | Nuclear receptor coactivator                                               | 0.497099225                    |
| NCOA3    | Nuclear receptor coactivator                                               | 0.497168236                    |
| NCOR1    | Nuclear receptor corepressor 1                                             | 0.489819992                    |
| NOTCH2   | notch 2                                                                    | 0.490423258                    |
| NR0B1    | <b>Nuclear receptor subfamily 0 group B member 1</b>                       | <b>3.985399293</b>             |
| NR0B2    | <b>Nuclear receptor subfamily 0 group B member 2</b>                       | <b>0.249599073</b>             |
| NR1D1    | Nuclear receptor subfamily 1 group D member 1                              | 2.001984093                    |
| NR1H4    | <b>Nuclear receptor subfamily 1 group H member 4</b>                       | <b>0.219646484</b>             |
| NR2C2    | Nuclear receptor subfamily 2 group C member 2                              | 0.493867798                    |
| NR2F6    | Nuclear receptor subfamily 2 group F member 6                              | 2.008144646                    |
| NR3C2    | Nuclear receptor subfamily 3 group C member 2                              | 1.966205721                    |
| NR4A1    | Nuclear receptor subfamily 4 group A member 1                              | 2.013490782                    |
| NR4A2    | Nuclear receptor subfamily 4 group A member 2                              | 2.006793749                    |
| NR4A3    | Nuclear receptor subfamily 4 group A member 3                              | 1.978526651                    |
| NR5A1    | <b>Nuclear receptor subfamily 5 group A member 1</b>                       | <b>2.66683E+06</b>             |
| NR5A2    | <b>Nuclear receptor subfamily 5 group A member 2</b>                       | <b>0.062379642</b>             |
| NR6A1    | Nuclear receptor subfamily 6 group A member 1                              | 1.988173463                    |
| NRIP1    | Nuclear receptor interacting protein 1                                     | 0.49971055                     |
| KAT2B    | Lysine acetyltransferase 2B                                                | 0.491418875                    |
| PGR      | <b>Progesterone receptor</b>                                               | <b>31.84258578</b>             |
| PPARA    | Peroxisome proliferator-activated receptor alpha                           | 0.498363973                    |
| PPARGC1A | Peroxisome proliferator-activated receptor gamma coactivator 1-alpha       | 0.502162286                    |
| PPARGC1B | <b>Peroxisome proliferator-activated receptor gamma coactivator 1-beta</b> | <b>7.783457029</b>             |
| PSMC3    | Proteasome 26S subunit ATPase 3                                            | 1.997637529                    |
| PSMC5    | Proteasome 26S subunit ATPase 5                                            | 2.012056485                    |
| RARA     | Retinoic acid receptor alpha                                               | 0.494233574                    |
| RARB     | <b>Retinoic acid receptor beta</b>                                         | <b>0.243442787</b>             |
| RARG     | Retinoic acid receptor gamma                                               | 0.497948397                    |
| FBPJ     | Recombining binding protein suppressor of hairless                         | 0.503475858                    |
| RORA     | RAR related orphan receptor A                                              | 0.495202227                    |
| RORC     | <b>Retinoic acid orphan receptor C</b>                                     | <b>11478.81608</b>             |
| RFXA     | Retinoic X receptor alpha                                                  | 0.494038242                    |
| RFXB     | Retinoic X receptor beta                                                   | 0.496204922                    |
| RFXG     | Retinoic X receptor gamma                                                  | 2.024292697                    |
| THRB     | <b>Thyroid hormone receptor beta</b>                                       | <b>4.015482279</b>             |
| VDR      | Vitamin D3 receptor                                                        | 0.49647987                     |

**Supplemental Table 2.** Nuclear receptors TaqMan array in LAM cells compared to normal SMC control (fold change).

| Sensitivity            | ESR1-Hs0 | ESRRG-Hs | HNF4A-Hs | HNF4G-Hs | NOTCH2-H | PPARGC1 | PPARGC1 | PGR-Hs00 | RARB-Hs0 | RXR-B-Hs0 | RXRG-Hs0 | THR-B-Hs0 | SUM    |
|------------------------|----------|----------|----------|----------|----------|---------|---------|----------|----------|-----------|----------|-----------|--------|
| ESR1-Hs00174860_m1     |          | 0.953    | 0.898    | 0.934    | 0.966    | 1.016   | 0.848   | 0.949    | 0.929    | 1.049     | 0.936    | 0.935     | 10.413 |
| ESRRG-Hs00155006_m1    | 1.632    |          | 1.735    | 1.393    | 1.513    | 1.421   | 1.829   | 1.416    | 1.433    | 1.305     | 1.640    | 1.714     | 17.033 |
| HNF4A-Hs00230853_m1    | 1.026    | 1.104    |          | 0.946    | 1.044    | 0.987   | 1.352   | 0.962    | 1.142    | 0.928     | 0.964    | 1.001     | 11.454 |
| HNF4G-Hs01071345_m1    | 0.962    | 1.091    | 0.892    |          | 1.066    | 0.981   | 0.820   | 0.941    | 1.068    | 1.132     | 0.961    | 1.105     | 11.020 |
| NOTCH2-Hs01050719_m1   | 0.495    | 0.489    | 0.502    | 0.478    |          | 0.489   | 0.629   | 0.485    | 0.545    | 0.628     | 0.482    | 0.680     | 5.904  |
| PPARGC1A-Hs01016719_m1 | 0.490    | 0.571    | 0.460    | 0.462    | 0.523    |         | 0.794   | 0.470    | 0.524    | 0.426     | 0.474    | 0.704     | 5.898  |
| PPARGC1B-Hs00991677_m1 | 1.462    | 1.387    | 1.330    | 1.377    | 1.474    | 1.404   |         | 1.400    | 1.344    | 1.430     | 1.429    | 1.361     | 15.399 |
| PGR-Hs00172183_m1      | 2.367    | 2.599    | 2.553    | 2.323    | 2.482    | 2.394   | 2.039   |          | 2.181    | 3.645     | 2.427    | 2.313     | 27.323 |
| RARB-Hs00233407_m1     | 0.939    | 0.939    | 0.912    | 0.948    | 1.061    | 1.167   | 0.905   | 0.964    |          | 0.942     | 0.965    | 1.122     | 10.865 |
| RXR-B-Hs00232774_m1    | 0.537    | 0.599    | 0.453    | 0.470    | 0.499    | 0.521   | 0.423   | 0.478    | 0.604    |           | 0.477    | 0.451     | 5.514  |
| RXRG-Hs00199455_m1     | 0.478    | 0.469    | 0.462    | 0.473    | 0.494    | 0.602   | 0.431   | 0.481    | 0.461    | 0.461     |          | 0.622     | 5.435  |
| THR-B-Hs00230861_m1    | 0.941    | 1.145    | 0.920    | 0.933    | 0.966    | 1.020   | 1.137   | 0.949    | 1.248    | 1.132     | 0.984    |           | 11.375 |
| AHR-Hs00169233_m1      | 0.984    | 1.092    | 0.917    | 0.939    | 0.977    | 0.973   | 1.012   | 0.955    | 0.834    | 0.943     | 1.038    | 1.060     | 11.725 |
| AR-Hs00171172_m1       | 0.006    | 0.006    | 0.007    | 0.006    | 0.007    | 0.007   | 0.006   | 0.006    | 0.007    | 0.010     | 0.006    | 0.006     | 0.080  |
| COPS2-Hs00182826_m1    | 0.484    | 0.504    | 0.463    | 0.478    | 0.504    | 0.507   | 0.433   | 0.486    | 0.840    | 0.512     | 0.488    | 0.572     | 6.272  |
| CREBBP-Hs00231733_m1   | 0.004    | 0.004    | 0.004    | 0.004    | 0.004    | 0.004   | 0.004   | 0.004    | 0.004    | 0.004     | 0.004    | 0.004     | 0.046  |
| ESR2-Hs00230957_m1     | 0.004    | 0.004    | 0.004    | 0.004    | 0.004    | 0.004   | 0.004   | 0.004    | 0.004    | 0.004     | 0.004    | 0.004     | 0.044  |
| ESRRB-Hs01584024_m1    | 0.456    | 0.451    | 0.515    | 0.419    | 0.433    | 0.489   | 0.506   | 0.426    | 0.411    | 0.424     | 0.464    | 0.410     | 5.405  |
| HDAC2-Hs00231032_m1    | 0.487    | 0.510    | 0.453    | 0.470    | 0.491    | 0.512   | 0.465   | 0.478    | 0.644    | 0.436     | 0.478    | 0.566     | 5.990  |
| HDAC3-Hs00187320_m1    | 0.008    | 0.008    | 0.008    | 0.008    | 0.008    | 0.008   | 0.012   | 0.008    | 0.008    | 0.010     | 0.009    | 0.010     | 0.106  |
| HDAC4-Hs01041648_m1    | 0.516    | 0.472    | 0.633    | 0.470    | 0.508    | 0.480   | 0.510   | 0.478    | 0.629    | 0.559     | 0.475    | 0.541     | 6.271  |
| HDAC5-Hs00608366_m1    | 0.008    | 0.009    | 0.008    | 0.008    | 0.009    | 0.008   | 0.008   | 0.008    | 0.010    | 0.008     | 0.008    | 0.009     | 0.103  |
| HDAC6-Hs00195869_m1    | 0.497    | 0.529    | 0.488    | 0.471    | 0.488    | 0.491   | 0.622   | 0.478    | 0.478    | 0.552     | 0.484    | 0.500     | 6.078  |
| HDAC7-Hs00248789_m1    | 0.476    | 0.467    | 0.677    | 0.471    | 0.494    | 0.524   | 0.436   | 0.479    | 0.519    | 0.476     | 0.472    | 0.500     | 5.991  |
| HMGAI-Hs00852949_g1    | 0.473    | 0.477    | 0.537    | 0.466    | 0.483    | 0.493   | 0.510   | 0.474    | 0.588    | 0.503     | 0.508    | 0.529     | 6.041  |
| KAT5-Hs00197310_m1     | 0.485    | 0.479    | 0.468    | 0.479    | 0.502    | 0.499   | 0.654   | 0.487    | 0.574    | 0.772     | 0.526    | 0.452     | 6.376  |
| ITGB3BP-Hs01100612_m1  | 0.492    | 0.458    | 0.637    | 0.462    | 0.478    | 0.475   | 0.408   | 0.469    | 0.581    | 0.529     | 0.463    | 0.479     | 5.930  |
| MED1-Hs01062349_m1     | 0.005    | 0.005    | 0.005    | 0.005    | 0.005    | 0.005   | 0.005   | 0.005    | 0.004    | 0.004     | 0.005    | 0.005     | 0.058  |
| MED12-Hs00192801_m1    | 0.005    | 0.006    | 0.005    | 0.005    | 0.005    | 0.005   | 0.005   | 0.006    | 0.005    | 0.006     | 0.005    | 0.006     | 0.067  |
| MED14-Hs00188481_m1    | 0.006    | 0.006    | 0.006    | 0.006    | 0.006    | 0.006   | 0.007   | 0.006    | 0.007    | 0.005     | 0.006    | 0.006     | 0.071  |
| MED16-Hs00193899_m1    | 0.009    | 0.010    | 0.012    | 0.009    | 0.010    | 0.010   | 0.009   | 0.010    | 0.009    | 0.013     | 0.010    | 0.010     | 0.121  |
| MED24-Hs00207863_m1    | 0.490    | 0.572    | 0.473    | 0.476    | 0.536    | 0.513   | 0.662   | 0.484    | 0.444    | 0.471     | 0.485    | 0.632     | 6.238  |
| MED4-Hs00204327_m1     | 0.005    | 0.006    | 0.005    | 0.005    | 0.005    | 0.005   | 0.005   | 0.005    | 0.004    | 0.007     | 0.005    | 0.005     | 0.064  |
| NCOA1-Hs00186661_m1    | 0.497    | 0.471    | 0.648    | 0.476    | 0.543    | 0.484   | 0.421   | 0.484    | 0.430    | 0.472     | 0.487    | 0.451     | 5.866  |
| NCOA2-Hs00896106_m1    | 0.514    | 0.471    | 0.597    | 0.469    | 0.494    | 0.485   | 0.420   | 0.477    | 0.647    | 0.456     | 0.485    | 0.575     | 6.089  |
| NCOA3-Hs00180722_m1    | 0.497    | 0.466    | 0.462    | 0.469    | 0.512    | 0.493   | 0.477   | 0.421    | 0.464    | 0.470     | 0.580    | 0.788     | 5.788  |
| NCOR1-Hs00196920_m1    | 0.512    | 0.492    | 0.522    | 0.479    | 0.512    | 0.526   | 0.474   | 0.487    | 0.653    | 0.468     | 0.487    | 0.485     | 6.097  |
| NNO-Hs00939763_g1      | 0.005    | 0.005    | 0.005    | 0.005    | 0.005    | 0.005   | 0.005   | 0.005    | 0.005    | 0.004     | 0.005    | 0.005     | 0.058  |
| NR0B1-Hs00230864_m1    | 1.029    | 0.980    | 0.980    | 0.928    | 1.014    | 0.971   | 1.004   | 0.944    | 1.045    | 0.938     | 0.956    | 1.103     | 11.892 |
| NR0B2-Hs00222677_m1    | 1.031    | 0.955    | 0.981    | 0.932    | 0.986    | 0.976   | 1.340   | 0.947    | 0.979    | 0.993     | 1.013    | 1.073     | 12.205 |
| NR1D1-Hs00253876_m1    | 0.496    | 0.462    | 0.448    | 0.466    | 0.505    | 0.475   | 0.423   | 0.474    | 0.652    | 0.502     | 0.516    | 0.483     | 5.902  |
| NR1D2-Hs00233309_m1    | 0.007    | 0.007    | 0.007    | 0.007    | 0.008    | 0.007   | 0.011   | 0.007    | 0.008    | 0.008     | 0.007    | 0.008     | 0.091  |
| NR1H3-Hs00172885_m1    | 0.005    | 0.005    | 0.005    | 0.005    | 0.005    | 0.005   | 0.004   | 0.005    | 0.004    | 0.007     | 0.005    | 0.006     | 0.062  |
| NR1H4-Hs00231968_m1    | 1.013    | 1.137    | 1.004    | 1.017    | 1.063    | 1.051   | 1.089   | 1.034    | 1.549    | 0.964     | 1.027    | 1.055     | 13.005 |
| NR1I2-Hs01114267_m1    | 0.004    | 0.005    | 0.004    | 0.004    | 0.004    | 0.005   | 0.007   | 0.004    | 0.005    | 0.007     | 0.004    | 0.004     | 0.057  |
| NR2C2-Hs00231489_m1    | 0.491    | 0.517    | 0.456    | 0.474    | 0.495    | 0.483   | 0.577   | 0.481    | 0.430    | 0.475     | 0.477    | 0.452     | 5.806  |
| NR2E3-Hs00183915_m1    | 0.019    | 0.020    | 0.019    | 0.018    | 0.020    | 0.019   | 0.018   | 0.019    | 0.023    | 0.019     | 0.021    | 0.023     | 0.236  |
| NR2F1-Hs00818842_m1    | 0.010    | 0.009    | 0.010    | 0.009    | 0.009    | 0.009   | 0.010   | 0.009    | 0.012    | 0.013     | 0.009    | 0.010     | 0.120  |
| NR2F6-Hs00172870_m1    | 0.480    | 0.594    | 0.526    | 0.468    | 0.501    | 0.484   | 0.513   | 0.476    | 0.509    | 0.464     | 0.474    | 0.484     | 5.971  |
| NR3C1-Hs00230818_m1    | 0.006    | 0.005    | 0.005    | 0.005    | 0.005    | 0.005   | 0.008   | 0.005    | 0.006    | 0.005     | 0.005    | 0.005     | 0.065  |
| NR3C2-Hs00230906_m1    | 0.468    | 0.494    | 0.460    | 0.454    | 0.472    | 0.486   | 0.482   | 0.461    | 0.404    | 0.583     | 0.473    | 0.458     | 5.695  |
| NR4A1-Hs00374230_m1    | 0.509    | 0.465    | 0.462    | 0.470    | 0.491    | 0.478   | 0.512   | 0.478    | 0.484    | 0.794     | 0.502    | 0.476     | 6.120  |
| NR4A2-Hs00428691_m1    | 0.466    | 0.551    | 0.454    | 0.468    | 0.486    | 0.476   | 0.423   | 0.475    | 0.604    | 0.468     | 0.472    | 0.812     | 6.155  |
| NR4A3-Hs00545009_g1    | 0.476    | 0.471    | 0.672    | 0.458    | 0.503    | 0.468   | 0.445   | 0.466    | 0.519    | 0.462     | 0.468    | 0.494     | 5.920  |
| NR5A2-Hs00187067_m1    | 2.189    | 2.069    | 1.956    | 1.862    | 1.981    | 1.898   | 2.363   | 1.893    | 1.614    | 3.171     | 1.887    | 2.508     | 25.391 |
| NR6A1-Hs00364256_m1    | 0.483    | 0.576    | 0.544    | 0.461    | 0.510    | 0.471   | 0.446   | 0.469    | 0.484    | 0.505     | 0.465    | 0.454     | 5.868  |
| NR1P1-Hs00942766_s1    | 0.462    | 0.467    | 0.537    | 0.466    | 0.498    | 0.566   | 0.584   | 0.473    | 0.669    | 0.449     | 0.467    | 0.439     | 6.078  |
| KAT2B-Hs00187332_m1    | 0.472    | 0.498    | 0.673    | 0.477    | 0.501    | 0.526   | 0.674   | 0.485    | 0.517    | 0.447     | 0.498    | 0.536     | 6.303  |
| PPARA-Hs00231882_m1    | 0.471    | 0.601    | 0.664    | 0.467    | 0.511    | 0.477   | 0.474   | 0.475    | 0.421    | 0.681     | 0.529    | 0.489     | 6.261  |
| PPARD-Hs00602622_m1    | 0.004    | 0.004    | 0.004    | 0.004    | 0.004    | 0.004   | 0.004   | 0.004    | 0.004    | 0.004     | 0.004    | 0.004     | 0.050  |
| PPARG-Hs00234592_m1    | 0.004    | 0.004    | 0.004    | 0.004    | 0.004    | 0.004   | 0.006   | 0.004    | 0.004    | 0.004     | 0.004    | 0.004     | 0.050  |
| PSMC3-Hs00267682_m1    | 0.476    | 0.487    | 0.468    | 0.464    | 0.482    | 0.494   | 0.685   | 0.472    | 0.462    | 0.545     | 0.468    | 0.440     | 5.946  |
| PSMC5-Hs00267687_m1    | 0.492    | 0.494    | 0.532    | 0.469    | 0.489    | 0.487   | 0.499   | 0.477    | 0.668    | 0.586     | 0.472    | 0.543     | 6.208  |
| RARA-Hs00940446_m1     | 0.518    | 0.471    | 0.456    | 0.473    | 0.494    | 0.482   | 0.606   | 0.481    | 0.537    | 0.532     | 0.486    | 0.499     | 6.035  |
| RARG-Hs00171273_m1     | 0.518    | 0.479    | 0.499    | 0.468    | 0.488    | 0.482   | 0.439   | 0.476    | 0.430    | 0.436     | 0.479    | 0.600     | 5.794  |
| RBPJ-Hs00794653_m1     | 0.475    | 0.485    | 0.502    | 0.461    | 0.480    | 0.529   | 0.471   | 0.468    | 0.532    | 0.433     | 0.506    | 0.664     | 6.004  |
| RORA-Hs00536545_m1     | 0.463    | 0.467    | 0.471    | 0.472    | 0.489    | 0.502   | 0.854   | 0.480    | 0.479    | 0.506     | 0.473    | 0.476     | 6.133  |
| RORB-Hs00199445_m1     | 0.007    | 0.007    | 0.006    | 0.007    | 0.007    | 0.007   | 0.008   | 0.007    | 0.006    | 0.006     | 0.007    | 0.006     | 0.084  |
| RXRA-Hs00172565_m1     | 0.478    | 0.584    | 0.593    | 0.473    | 0.517    | 0.482   | 0.748   | 0.481    | 0.903    | 0.439     | 0.496    | 0.731     | 6.926  |
| TGS1-Hs00227358_m1     | 0.004    | 0.004    | 0.005    | 0.004    | 0.004    | 0.004   | 0.004   | 0.004    | 0.004    | 0.004     | 0.004    | 0.004     | 0.051  |
| THRA-Hs00268470_m1     | 0.004    | 0.004    | 0.004    | 0.004    | 0.004    | 0.004   | 0.006   | 0.004    | 0.006    | 0.004     | 0.004    | 0.004     | 0.051  |
| TRIP4-Hs00249373_m1    | 0.005    | 0.004    | 0.004    | 0.004    | 0.004    | 0.004   | 0.007   | 0.004    | 0.005    | 0.004     | 0.005    | 0.005     | 0.055  |
| VDR-Hs01045840_m1      | 0.486    | 0.483    | 0.531    | 0.470    | 0.486    | 0.478   | 0.414   | 0.478    | 0.520    | 0.512     | 0.478    | 0.524     | 5.860  |
| SUM                    | 33.773   | 34.192   | 34.622   | 31.991   | 34.630   | 34.314  | 35.447  | 31.102   | 35.741   | 37.183    | 33.780   | 36.285    |        |

0 - 0.500 1.501 - 1.000 0.001 - 2.000 0.001 - 3.000 > 3.001

Sensitivity color code

Supplemental Table 3. ANN analysis of nuclear receptors array.

|                               | SMC            | LAM                 |
|-------------------------------|----------------|---------------------|
| Activin A                     | 4265           | 4887.666667         |
| ADAMTS-1                      | 1399.5         | 1711.333333         |
| Angiogenin                    | 1704.5         | 2322.833333         |
| Angiopoietin-1                | 4188           | 5308.5              |
| Angiopoietin-2                | 9787           | 9318.5              |
| Angiostatin/Plasminogen       | 2840           | 3235.5              |
| Amphiregulin                  | 2454           | 3210.666667         |
| Artemin                       | 5750.5         | 5442.833333         |
| <b>Coagulation Factor III</b> | <b>3115</b>    | <b>15816.5</b>      |
| <b>CXCL16</b>                 | <b>2082.5</b>  | <b>14733.833333</b> |
| DPPIV                         | 9097.5         | 9576.333333         |
| EGF                           | 1107           | 1086.666667         |
| EG-VEGF                       | 3492.5         | 3075                |
| <b>Endoglin</b>               | <b>2048</b>    | <b>3380.833333</b>  |
| Endostatin/Collagen XVIII     | 2335.5         | 2073.333333         |
| <b>Endothelin-1</b>           | <b>13332.5</b> | <b>11469.333333</b> |
| FGF acidic                    | 3620           | 2801                |
| <b>FGF basic</b>              | <b>2823</b>    | <b>13145.5</b>      |
| FGF-4                         | 1629.5         | 1600.666667         |
| <b>FGF-7</b>                  | <b>572</b>     | <b>1052.666667</b>  |
| GDNF                          | 2005.5         | 1880.833333         |
| GM-CSF                        | 1893           | 1675.166667         |
| HB-EGF                        | 2784           | 2564.5              |
| HGF                           | 2204           | 2232.333333         |
| IGFBP-1                       | 6578           | 5212.833333         |
| IGFBP-2                       | 1782           | 1546                |
| IGFBP-3                       | 3908           | 3677.333333         |
| IL-1 $\beta$                  | 2013.5         | 1684                |

|                         | SMC            | LAM                |
|-------------------------|----------------|--------------------|
| LAP (TGF- $\beta$ 1)    | 2127           | 2526.5             |
| Leptin                  | 1014.5         | 1569.166667        |
| <b>MCP-1</b>            | <b>752</b>     | <b>2519.166667</b> |
| MIP-1 $\alpha$          | 3519           | 3029.666667        |
| MMP-8                   | 2489.5         | 2002.75            |
| MMP-9                   | 2986.5         | 2589.666667        |
| NRG1- $\beta$ 1         | 2037           | 1778               |
| Pentraxin 3 (PTX3)      | 5368.5         | 4717.5             |
| PD-ECGF                 | 2957           | 2394.166667        |
| PDGF-AA                 | 2638           | 2177.666667        |
| PDGF-AB/PDGF-BB         | 1036.5         | 953.5              |
| Persephin               | 7634.5         | 6489.5             |
| Platelet Factor 4 (PF4) | 2442           | 2524.5             |
| <b>PIGF</b>             | <b>2538.5</b>  | <b>3752.5</b>      |
| Prolactin               | 1949.5         | 2396               |
| Serpin B5               | 2860.5         | 2933.5             |
| <b>Serpin E1</b>        | <b>15933.5</b> | <b>1834</b>        |
| Serpin F1               | 5260           | 4779.5             |
| <b>TIMP-1</b>           | <b>7144.5</b>  | <b>13233.5</b>     |
| TIMP-4                  | 3462           | 2918.166667        |
| Thrombospondin-1        | 21223.5        | 18811              |
| Thrombospondin-2        | 4154.5         | 3729.166667        |
| <b>uPA</b>              | <b>6238</b>    | <b>13104</b>       |
| Vasohibin               | 4284           | 3879               |
| VEGF                    | 2054.5         | 2476.166667        |
| <b>VEGF-C</b>           | <b>1478</b>    | <b>2595</b>        |
| <b>IL-8</b>             | <b>1658.5</b>  | <b>4653.333333</b> |

**Supplemental Table 4.** Angiogenesis protein array. Data is presented as mean of pixel intensity in both normal SMC control and LAM cells.



| Sensitivity               | Endothelin       | FGF basic        | IL-8             | MCP-1            | TIMP-1           | VEGF-C           | SUM       |
|---------------------------|------------------|------------------|------------------|------------------|------------------|------------------|-----------|
| Endothelin-1              |                  | 846.435          | 959.987          | 816.482          | 853.177          | 846.132          | 4322.213  |
| FGF basic                 | 4956.650         |                  | 4715.427         | 4988.697         | 4773.568         | 4665.403         | 24099.745 |
| IL-8                      | 1299.729         | 1187.348         |                  | 1390.009         | 1358.681         | 1341.215         | 6576.982  |
| MCP-1                     | 1087.942         | 691.797          | 687.180          |                  | 825.387          | 806.940          | 4099.246  |
| TIMP-1                    | 2612.796         | 2656.639         | 2848.314         | 2820.399         |                  | 2920.958         | 13859.107 |
| VEGF-C                    | 479.514          | 553.909          | 536.589          | 482.343          | 507.294          |                  | 2559.647  |
| Activin A                 | 266.300          | 288.171          | 231.391          | 262.720          | 291.212          | 283.845          | 1623.639  |
| ADAMTS-1                  | 144.877          | 115.017          | 140.880          | 143.971          | 142.806          | 156.087          | 843.637   |
| Angiogenin                | 268.060          | 424.238          | 258.012          | 298.918          | 280.562          | 275.977          | 1805.767  |
| Angiopoietin-1            | 492.178          | 811.680          | 474.231          | 556.263          | 535.910          | 516.315          | 3386.576  |
| Angiopoietin-2            | 259.490          | 196.789          | 191.784          | 214.185          | 233.432          | 204.234          | 1299.915  |
| Angiostatin/Plasminogen   | 196.760          | 147.149          | 156.631          | 166.809          | 184.647          | 172.930          | 1024.925  |
| Amphiregulin              | 344.225          | 294.554          | 322.181          | 348.522          | 346.554          | 348.780          | 2004.816  |
| Artemin                   | 138.666          | 129.351          | 131.529          | 132.501          | 139.593          | 151.503          | 823.141   |
| Coagulation Factor III    | 7988.118         | 5016.408         | 5562.977         | 5394.201         | 5818.673         | 5896.713         | 35677.090 |
| CXCL16                    | 5465.105         | 8193.719         | 5053.841         | 6199.150         | 5861.603         | 5952.780         | 36726.198 |
| DPPIV                     | 204.874          | 282.486          | 212.422          | 227.183          | 232.306          | 206.003          | 1365.274  |
| EG-VEGF                   | 180.953          | 204.033          | 165.295          | 223.586          | 196.010          | 209.415          | 1179.291  |
| Endoglin                  | 624.338          | 772.439          | 547.943          | 578.656          | 605.022          | 584.922          | 3713.319  |
| Endostatin/Collagen XVIII | 133.706          | 112.406          | 159.498          | 109.278          | 119.923          | 134.343          | 769.155   |
| FGF acidic                | 350.786          | 291.371          | 345.859          | 357.283          | 374.741          | 363.230          | 2083.270  |
| FGF-7                     | 228.111          | 196.415          | 178.740          | 220.801          | 236.202          | 221.594          | 1281.864  |
| IGFBP-1                   | 583.402          | 566.470          | 500.395          | 747.859          | 622.490          | 618.988          | 3639.604  |
| IL-1 $\beta$              | 150.226          | 171.739          | 134.171          | 192.256          | 153.653          | 161.024          | 963.069   |
| LAP (TGF- $\beta$ 1)      | 182.990          | 227.550          | 156.306          | 207.912          | 185.079          | 174.443          | 1134.280  |
| Leptin                    | 251.406          | 283.293          | 221.453          | 262.507          | 261.437          | 252.383          | 1532.480  |
| MIP-1 $\alpha$            | 213.201          | 183.990          | 205.949          | 256.104          | 225.388          | 224.326          | 1308.958  |
| MMP-8                     | 211.509          | 196.413          | 193.463          | 227.566          | 220.890          | 221.062          | 1270.903  |
| MMP-9                     | 221.387          | 149.208          | 220.221          | 182.451          | 181.552          | 173.100          | 1127.920  |
| NRG1- $\beta$ 1           | 116.159          | 115.018          | 125.129          | 117.229          | 118.780          | 114.817          | 707.132   |
| Pentraxin 3 (PTX3)        | 287.223          | 262.585          | 302.465          | 292.743          | 322.450          | 309.709          | 1777.174  |
| PD-ECGF                   | 292.156          | 249.161          | 250.816          | 258.880          | 264.239          | 261.859          | 1577.111  |
| PDGF-AA                   | 196.849          | 209.174          | 191.443          | 202.989          | 225.201          | 261.143          | 1286.800  |
| Persephin                 | 489.160          | 492.910          | 453.478          | 544.794          | 528.822          | 499.047          | 3008.211  |
| PIGF                      | 689.377          | 454.724          | 671.887          | 543.113          | 562.751          | 583.094          | 3504.945  |
| Prolactin                 | 195.335          | 192.353          | 182.520          | 216.285          | 211.527          | 244.157          | 1242.177  |
| Serpin E1                 | 9113.180         | 5594.563         | 5402.603         | 6239.449         | 6571.685         | 6511.436         | 39432.917 |
| Serpin F1                 | 206.274          | 182.903          | 239.225          | 211.621          | 218.242          | 227.764          | 1286.028  |
| TIMP-4                    | 249.392          | 228.117          | 249.566          | 245.664          | 264.707          | 253.996          | 1491.442  |
| Thrombospondin-1          | 1126.451         | 1168.525         | 1042.923         | 1135.291         | 1094.995         | 1195.648         | 6763.833  |
| Thrombospondin-2          | 196.404          | 173.760          | 163.017          | 227.644          | 196.801          | 187.176          | 1144.803  |
| uPA                       | 2963.300         | 2789.770         | 3727.029         | 2914.810         | 3199.771         | 3043.316         | 18637.996 |
| Vasohibin                 | 177.586          | 191.335          | 151.472          | 210.629          | 183.726          | 191.951          | 1106.699  |
| VEGF                      | 184.804          | 190.282          | 181.257          | 194.019          | 191.722          | 183.180          | 1125.265  |
| <b>SUM</b>                | <b>46020.948</b> | <b>37686.196</b> | <b>38847.500</b> | <b>41563.772</b> | <b>39923.209</b> | <b>42152.939</b> |           |

0 - 500   501 - 2000   2001 - 5000   5001 - 8000   > 8000

Sensitivity color code

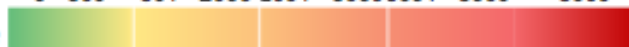

Supplemental Table 5. ANN analysis of Angiogenesis protein array.
